# Supplementary material for: High prevalence of extended-spectrum beta-lactamase-producing Gram-negative pathogens from patients attending Felege Hiwot Comprehensive Specialized Hospital, Bahir Dar, Amhara region
Source: PubMed Central journal article supplement (PMC6464180; doi:10.1371/journal.pone.0215177), 2019-04-15
Supplement: pone.0215177.s002.pdf [file pone.0215177.s002.pdf]

| ID    | MRN     | Sex  | Age   | residence | School | level of school | occupat i on | pat i ent set t i ng | ward |
|-------|---------|------|-------|-----------|--------|-----------------|--------------|----------------------|------|
| 1.00  | #####   | 2.00 | 3.00  | 2.00      | .00    | .00             | 5.00         | 2.00                 | 1.00 |
| 4.00  | #####   | 2.00 | 1.00  | 2.00      | .00    | .00             | 5.00         | 2.00                 | 1.00 |
| 5.00  | 1101.00 | 1.00 | 1.00  | 1.00      | .00    | .00             | 1.00         | 2.00                 | 1.00 |
| 6.00  | 1102.00 | 1.00 | 1.00  | 2.00      | .00    | .00             | -1.00        | 2.00                 | 5.00 |
| 7.00  | 1094.00 | 1.00 | 1.00  | 2.00      | .00    | .00             | 5.00         | 2.00                 | 5.00 |
| 8.00  | 1103.00 | 2.00 | 3.00  | 2.00      | .00    | .00             | 5.00         | 2.00                 | 5.00 |
| 9.00  | 1104.00 | 2.00 | 1.00  | 2.00      | .00    | .00             | 5.00         | 2.00                 | 5.00 |
| 10.00 | 1105.00 | 2.00 | 1.00  | 2.00      | .00    | .00             | 5.00         | 2.00                 | 5.00 |
| 11.00 | 1117.00 | 1.00 | 1.00  | 2.00      | .00    | .00             | -1.00        | 2.00                 | 1.00 |
| 12.00 | 1119.00 | 1.00 | 1.00  | 1.00      | .00    | .00             | -1.00        | 2.00                 | 5.00 |
| 2.00  | #####   | 1.00 | 1.00  | 2.00      | .00    | .00             | 5.00         | 2.00                 | 1.00 |
| 3.00  | #####   | 1.00 | 1.00  | 2.00      | .00    | .00             | 5.00         | 2.00                 | 1.00 |
| 13.00 | 1116.00 | 1.00 | 1.00  | 2.00      | .00    | .00             | 5.00         | 2.00                 | 1.00 |
| 14.00 | 1122.00 | 2.00 | 1.00  | 2.00      | .00    | .00             | 5.00         | 2.00                 | 5.00 |
| 15.00 | 1127.00 | 1.00 | 2.00  | 2.00      | .00    | .00             | 5.00         | 2.00                 | 1.00 |
| 16.00 | 1120.00 | 2.00 | 13.00 | 1.00      | 1.00   | 1.00            | 6.00         | 2.00                 | 1.00 |
| 17.00 | 1121.00 | 1.00 | 1.00  | 1.00      | .00    | .00             | 2.00         | 2.00                 | 1.00 |
| 18.00 | 1124.00 | 2.00 | 1.00  | 1.00      | .00    | .00             | -1.00        | 2.00                 | 5.00 |
| 19.00 | 1130.00 | 2.00 | 21.00 | 1.00      | .00    | .00             | 5.00         | 2.00                 | 1.00 |
| 20.00 | 1131.00 | 2.00 | 40.00 | 2.00      | .00    | .00             | 5.00         | 2.00                 | 4.00 |
| 21.00 | 1133.00 | 2.00 | 2.00  | 2.00      | .00    | .00             | 5.00         | 2.00                 | 1.00 |
| 22.00 | 1139.00 | 1.00 | 1.00  | 1.00      | .00    | .00             | 1.00         | 2.00                 | 5.00 |
| 23.00 | 1140.00 | 1.00 | 14.00 | 2.00      | .00    | .00             | 5.00         | 2.00                 | 4.00 |
| 24.00 | 1134.00 | 1.00 | 1.00  | 2.00      | .00    | .00             | 5.00         | 2.00                 | 5.00 |
| 25.00 | 1150.00 | 1.00 | 1.00  | 2.00      | .00    | .00             | 5.00         | 2.00                 | 5.00 |
| 26.00 | 1156.00 | 2.00 | 23.00 | 1.00      | .00    | .00             | 5.00         | 2.00                 | 4.00 |
| 27.00 | 1165.00 | 1.00 | 1.00  | 2.00      | .00    | .00             | 5.00         | 2.00                 | 5.00 |
| 28.00 | 1167.00 | 1.00 | 1.00  | 1.00      | 1.00   | 3.00            | 1.00         | 2.00                 | 5.00 |
| 29.00 | 1169.00 | 2.00 | 25.00 | 2.00      | .00    | .00             | 5.00         | 2.00                 | 5.00 |
| 30.00 | 1177.00 | 2.00 | 1.00  | 2.00      | .00    | .00             | 5.00         | 2.00                 | 5.00 |
| 31.00 | 1183.00 | 2.00 | 1.00  | 2.00      | .00    | .00             | 5.00         | 2.00                 | 5.00 |
| 32.00 | 1157.00 | 2.00 | 26.00 | 1.00      | 1.00   | 2.00            | 3.00         | 2.00                 | 2.00 |
| 33.00 | 1191.00 | 1.00 | 1.00  | 2.00      | .00    | .00             | 5.00         | 2.00                 | 5.00 |
| 34.00 | 1186.00 | 1.00 | 1.00  | 1.00      | .00    | .00             | 2.00         | 2.00                 | 5.00 |
| 35.00 | 1174.00 | 2.00 | 13.00 | 2.00      | .00    | .00             | 5.00         | 2.00                 | 1.00 |
| 36.00 | 1200.00 | 1.00 | 1.00  | 2.00      | .00    | .00             | -1.00        | 2.00                 | 5.00 |
| 37.00 | 1199.00 | 2.00 | 1.00  | 2.00      | .00    | .00             | 5.00         | 2.00                 | 3.00 |
| 38.00 | 1202.00 | 1.00 | 35.00 | 2.00      | .00    | .00             | 5.00         | 2.00                 | 3.00 |
| 39.00 | 1206.00 | 1.00 | 1.00  | 2.00      | .00    | .00             | 5.00         | 2.00                 | 1.00 |
| 41.00 | 1219.00 | 2.00 | 4.00  | 1.00      | .00    | .00             | -1.00        | 2.00                 | 1.00 |
| 42.00 | 1210.00 | 1.00 | 1.00  | 2.00      | .00    | .00             | -1.00        | 2.00                 | 5.00 |
| 43.00 | 1214.00 | 1.00 | 1.00  | 2.00      | .00    | .00             | 5.00         | 2.00                 | 5.00 |
| 44.00 | 1215.00 | 1.00 | 1.00  | 2.00      | .00    | .00             | 5.00         | 2.00                 | 1.00 |
| 45.00 | 1218.00 | 2.00 | 1.00  | 2.00      | .00    | .00             | 5.00         | 2.00                 | 1.00 |
| 46.00 | 1222.00 | 1.00 | 1.00  | 2.00      | .00    | .00             | 5.00         | 2.00                 | 1.00 |
| 47.00 | 1224.00 | 1.00 | 18.00 | 1.00      | 1.00   | 2.00            | 6.00         | 1.00                 | .00  |
| 48.00 | 1213.00 | 2.00 | 4.00  | 1.00      | 1.00   | 2.00            | 2.00         | 2.00                 | 1.00 |
| 49.00 | 1225.00 | 2.00 | 1.00  | 2.00      | .00    | .00             | 3.00         | 2.00                 | 5.00 |
| 50.00 | 1226.00 | 1.00 | 1.00  | 1.00      | 1.00   | 2.00            | 3.00         | 2.00                 | 1.00 |
| 51.00 | 1211.00 | 1.00 | 35.00 | 2.00      | 1.00   | 2.00            | 5.00         | 1.00                 | .00  |
| 52.00 | 1216.00 | 1.00 | 1.00  | 2.00      | .00    | .00             | 5.00         | 2.00                 | 1.00 |
| 53.00 | 1244.00 | 1.00 | 18.00 | 2.00      | 1.00   | 2.00            | 6.00         | 2.00                 | 4.00 |
| 54.00 | 1245.00 | 1.00 | 1.00  | 2.00      | 1.00   | 2.00            | 3.00         | 2.00                 | 1.00 |
| 55.00 | 1250.00 | 1.00 | 1.00  | 1.00      | .00    | .00             | 5.00         | 2.00                 | 1.00 |
| 56.00 | 1228.00 | 1.00 | 1.00  | 1.00      | 1.00   | 2.00            | 2.00         | 2.00                 | 1.00 |

|        |         |      |       |      |      |      |        |      |      |
|--------|---------|------|-------|------|------|------|--------|------|------|
| 57.00  | 1237.00 | 1.00 | 4.00  | 2.00 | .00  | .00  | 3.00   | 2.00 | 1.00 |
| 58.00  | 1260.00 | 2.00 | 1.00  | 1.00 | 1.00 | 3.00 | 1.00   | 2.00 | 1.00 |
| 59.00  | 1253.00 | 1.00 | 1.00  | 1.00 | 1.00 | 2.00 | 6.00   | 2.00 | 1.00 |
| 60.00  | 1258.00 | 1.00 | 1.00  | 2.00 | .00  | .00  | 5.00   | 2.00 | .00  |
| 61.00  | 1262.00 | 2.00 | 1.00  | 1.00 | 1.00 | 3.00 | 1.00   | 2.00 | 1.00 |
| 62.00  | 1268.00 | 2.00 | 1.00  | 2.00 | .00  | .00  | 5.00   | 2.00 | 5.00 |
| 63.00  | 1276.00 | 1.00 | 45.00 | 1.00 | .00  | .00  | 2.00   | 1.00 | .00  |
| 64.00  | 1267.00 | 1.00 | 1.00  | 2.00 | .00  | .00  | 5.00   | 2.00 | 5.00 |
| 65.00  | 1266.00 | 1.00 | 1.00  | 2.00 | .00  | .00  | 5.00   | 2.00 | 5.00 |
| 66.00  | 1278.00 | 1.00 | 1.00  | 2.00 | .00  | .00  | 5.00   | 2.00 | 5.00 |
| 67.00  | 1279.00 | 2.00 | 11.00 | 1.00 | 1.00 | 1.00 | 6.00   | 2.00 | 1.00 |
| 68.00  | 1287.00 | 1.00 | 1.00  | 2.00 | .00  | .00  | 5.00   | 2.00 | 5.00 |
| 69.00  | 1291.00 | 2.00 | 1.00  | 2.00 | .00  | .00  | 5.00   | 2.00 | 5.00 |
| 70.00  | 1290.00 | 2.00 | 60.00 | 2.00 | .00  | .00  | 3.00   | 2.00 | 7.00 |
| 71.00  | 1300.00 | 1.00 | 18.00 | 2.00 | 1.00 | 2.00 | 6.00   | 2.00 | 4.00 |
| 72.00  | 1301.00 | 2.00 | 1.00  | 1.00 | 1.00 | 2.00 | 3.00   | 2.00 | 5.00 |
| 73.00  | 1270.00 | 2.00 | 1.00  | 2.00 | 1.00 | 1.00 | 5.00   | 2.00 | 1.00 |
| 74.00  | - 1.00  | 2.00 | 1.00  | 1.00 | 1.00 | 2.00 | 2.00   | 2.00 | 1.00 |
| 75.00  | 1304.00 | 2.00 | 75.00 | 2.00 | .00  | .00  | 5.00   | 2.00 | 4.00 |
| 76.00  | 1302.00 | 1.00 | 1.00  | 2.00 | .00  | .00  | 5.00   | 2.00 | 1.00 |
| 77.00  | - 1.00  | 1.00 | 1.00  | 1.00 | 1.00 | 2.00 | 2.00   | 2.00 | 1.00 |
| 78.00  | 1328.00 | 2.00 | 28.00 | 1.00 | 1.00 | 3.00 | 1.00   | 1.00 | .00  |
| 79.00  | 1306.00 | 1.00 | 1.00  | 2.00 | .00  | .00  | 3.00   | 2.00 | 5.00 |
| 80.00  | 1333.00 | 1.00 | 1.00  | 2.00 | .00  | .00  | 3.00   | 2.00 | 5.00 |
| 81.00  | 1334.00 | 2.00 | 4.00  | 2.00 | .00  | .00  | - 1.00 | 2.00 | 1.00 |
| 82.00  | 1336.00 | 2.00 | 1.00  | 1.00 | 1.00 | 3.00 | 2.00   | 2.00 | 5.00 |
| 83.00  | 1340.00 | 2.00 | 40.00 | 2.00 | 1.00 | 1.00 | 3.00   | 2.00 | 4.00 |
| 84.00  | 1349.00 | 2.00 | 1.00  | 1.00 | 1.00 | 2.00 | 2.00   | 2.00 | 5.00 |
| 85.00  | 1344.00 | 1.00 | 38.00 | 1.00 | 1.00 | 3.00 | 1.00   | 1.00 | .00  |
| 86.00  | 1344.00 | 1.00 | 38.00 | 1.00 | 1.00 | 3.00 | 1.00   | 1.00 |      |
| 87.00  | 1357.00 | 1.00 | 8.00  | 1.00 | .00  | .00  | 5.00   | 2.00 | 1.00 |
| 88.00  | 1342.00 | 1.00 | 7.00  | 1.00 | .00  | .00  | 5.00   | 2.00 | 1.00 |
| 89.00  | 1356.00 | 1.00 | 12.00 | 2.00 | 1.00 | 1.00 | 6.00   | 2.00 | 1.00 |
| 90.00  | 1358.00 | 2.00 | 1.00  | 2.00 | .00  | .00  | 3.00   | 2.00 | 1.00 |
| 91.00  | 1362.00 | 2.00 | 54.00 | 1.00 | 1.00 | 2.00 | 2.00   | 1.00 | .00  |
| 92.00  | 1364.00 | 1.00 | 21.00 | 2.00 | .00  | .00  | 2.00   | 2.00 | 1.00 |
| 93.00  | 1367.00 | 2.00 | 28.00 | 2.00 | .00  | .00  | 5.00   | 2.00 | 4.00 |
| 94.00  | 1371.00 | 1.00 | 1.00  | 1.00 | 1.00 | 3.00 | 1.00   | 2.00 | 5.00 |
| 95.00  | 1372.00 | 1.00 | 2.00  | 2.00 | .00  | .00  | 5.00   | 2.00 | 1.00 |
| 96.00  | 1376.00 | 2.00 | 5.00  | 1.00 | 1.00 | 1.00 | 1.00   | 1.00 | .00  |
| 97.00  | 1377.00 | 2.00 | 28.00 | 1.00 | .00  | .00  | 3.00   | 2.00 | 4.00 |
| 98.00  | 1359.00 | 2.00 | 1.00  | 1.00 | 1.00 | 3.00 | 1.00   | 2.00 | 5.00 |
| 99.00  | 1378.00 | 2.00 | 15.00 | 2.00 | 1.00 | 1.00 | 6.00   | 1.00 | .00  |
| 100.00 | 1380.00 | 1.00 | 2.00  | 2.00 | .00  | .00  | 3.00   | 2.00 | 5.00 |
| 101.00 |         | 1.00 | 1.00  | 1.00 | 1.00 | 2.00 | 2.00   | 2.00 | 1.00 |
| 102.00 |         | 2.00 | 12.00 | 2.00 | 1.00 | 1.00 | 6.00   | 2.00 | 1.00 |
| 103.00 |         | 1.00 | 60.00 | 2.00 | 1.00 | 2.00 | 2.00   | 2.00 | 4.00 |
| 104.00 |         | 2.00 | 25.00 | 2.00 | .00  | .00  | 3.00   | 2.00 | 2.00 |
| 105.00 |         | 2.00 | 1.00  | 1.00 | .00  | .00  | 3.00   | 2.00 | 1.00 |
| 106.00 |         | 2.00 | 1.00  | 2.00 | .00  | .00  | 5.00   | 2.00 | 5.00 |
| 107.00 |         | 1.00 | 1.00  | 1.00 | .00  | .00  | 5.00   | 2.00 | 1.00 |
| 108.00 |         | 1.00 | 1.00  | 2.00 | .00  | .00  | 5.00   | 2.00 | 1.00 |
| 109.00 |         | 2.00 | 1.00  | 1.00 | 1.00 | 2.00 | 2.00   | 2.00 | 1.00 |
| 110.00 |         | 2.00 | 1.00  | 1.00 | 1.00 | 3.00 | 1.00   | 2.00 | 1.00 |
| 111.00 |         | 2.00 | 1.00  | 2.00 | .00  | .00  | 5.00   | 2.00 | 1.00 |
| 112.00 |         | 1.00 | 1.00  | 2.00 | .00  | .00  | 5.00   | 2.00 | 5.00 |

|        |      |       |      |      |      |       |      |      |
|--------|------|-------|------|------|------|-------|------|------|
| 113.00 | 1.00 | 1.00  | 2.00 | .00  | .00  | 5.00  | 2.00 | 1.00 |
| 114.00 | 2.00 | 6.00  | 1.00 | .00  | .00  | 5.00  | 2.00 | 1.00 |
| 115.00 | 2.00 | 1.00  | 1.00 | 1.00 | 3.00 | 2.00  | 2.00 | 1.00 |
| 116.00 | 2.00 | 24.00 | 1.00 | 1.00 | 2.00 | 3.00  | 2.00 | 2.00 |
| 117.00 | 1.00 | 1.00  | 2.00 | .00  | .00  | 5.00  | 2.00 | 5.00 |
| 118.00 | 1.00 | 1.00  | 1.00 | .00  | .00  | 5.00  | 2.00 | 5.00 |
| 119.00 | 1.00 | 42.00 | 2.00 | .00  | .00  | 5.00  | 1.00 | .00  |
| 120.00 | 1.00 | 45.00 | 2.00 | .00  | .00  | 5.00  | 1.00 | .00  |
| 121.00 | 1.00 | 1.00  | 2.00 | .00  | .00  | 5.00  | 2.00 | 1.00 |
| 122.00 | 1.00 | 11.00 | 2.00 | 1.00 | 1.00 | 6.00  | 2.00 | 1.00 |
| 123.00 | 1.00 | 22.00 | 1.00 | 1.00 | 2.00 | 6.00  | 2.00 | 3.00 |
| 124.00 | 2.00 | 1.00  | 1.00 | 1.00 | 3.00 | 1.00  | 1.00 | .00  |
| 125.00 | 1.00 | 1.00  | 2.00 | .00  | .00  | 5.00  | 2.00 | 5.00 |
| 126.00 | 2.00 | 1.00  | 2.00 | .00  | .00  | 5.00  | 2.00 | 5.00 |
| 127.00 | 1.00 | 53.00 | 1.00 | 1.00 | 2.00 | 2.00  | 1.00 | .00  |
| 128.00 | 1.00 | 1.00  | 2.00 | .00  | .00  | 5.00  | 2.00 | 5.00 |
| 129.00 | 1.00 | 1.00  | 2.00 | .00  | .00  | 5.00  | 2.00 | 5.00 |
| 130.00 | 2.00 | 1.00  | 2.00 | .00  | .00  | 5.00  | 2.00 | 1.00 |
| 131.00 | 2.00 | 45.00 | 2.00 | .00  | .00  | 5.00  | 2.00 | 4.00 |
| 132.00 | 2.00 | 1.00  | 1.00 | .00  | .00  | 5.00  | 2.00 | 1.00 |
| 133.00 | 1.00 | 1.00  | 1.00 | .00  | .00  | 5.00  | 2.00 | 5.00 |
| 134.00 | 1.00 | 58.00 | 2.00 | .00  | .00  | 5.00  | 1.00 | .00  |
| 135.00 | 1.00 | 1.00  | 1.00 | .00  | .00  | -1.00 | 2.00 | 5.00 |
| 136.00 | 2.00 | 25.00 | 2.00 | .00  | .00  | 3.00  | 2.00 | 2.00 |
| 137.00 | 2.00 | 25.00 | 2.00 | .00  | .00  | 3.00  | 2.00 | 2.00 |
| 138.00 | 2.00 | 1.00  | 2.00 | .00  | .00  | 5.00  | 2.00 | 1.00 |
| 139.00 | 1.00 | 28.00 | 1.00 | 1.00 | 3.00 | 1.00  | 1.00 | .00  |
| 140.00 | 2.00 | 1.00  | 2.00 | .00  | .00  | 5.00  | 2.00 | 1.00 |
| 141.00 | 2.00 | 25.00 | 1.00 | 1.00 | 3.00 | 1.00  | 1.00 | .00  |
| 142.00 | 1.00 | 1.00  | 2.00 | .00  | .00  | 5.00  | 2.00 | 5.00 |
| 143.00 | 2.00 | 1.00  | 2.00 | .00  | .00  | 5.00  | 2.00 | 5.00 |
| 144.00 | 2.00 | 1.00  | 2.00 | .00  | .00  | 5.00  | 2.00 | 1.00 |
| 145.00 | 1.00 | 1.00  | 2.00 | .00  | .00  | 5.00  | 2.00 | 5.00 |
| 146.00 | 1.00 | 2.00  | 1.00 | 1.00 | 3.00 | 1.00  | 2.00 | 1.00 |
| 147.00 | 1.00 | 1.00  | 2.00 | .00  | .00  | 5.00  | 2.00 | 5.00 |
| 148.00 | 2.00 | 30.00 | 2.00 | .00  | .00  | 5.00  | 2.00 | 4.00 |
| 149.00 | 1.00 | 1.00  | 2.00 | .00  | .00  | 5.00  | 2.00 | 5.00 |
| 150.00 | 2.00 | 63.00 | 1.00 | .00  | .00  | 3.00  | 2.00 | 7.00 |
| 151.00 | 1.00 | 1.00  | 2.00 | .00  | .00  | 5.00  | 2.00 | 5.00 |
| 152.00 | 1.00 | 32.00 | 1.00 | 1.00 | 3.00 | 1.00  | 1.00 | .00  |
| 153.00 | 2.00 | 3.00  | 1.00 | .00  | .00  | 3.00  | 2.00 | 1.00 |
| 154.00 | 2.00 | 1.00  | 1.00 | .00  | .00  | 3.00  | 2.00 | 1.00 |
| 155.00 | 1.00 | 1.00  | 2.00 | .00  | .00  | 5.00  | 2.00 | 5.00 |
| 156.00 | 1.00 | 1.00  | 2.00 | .00  | .00  | 5.00  | 2.00 | 5.00 |
| 157.00 | 1.00 | 1.00  | 2.00 | .00  | .00  | 5.00  | 2.00 | 5.00 |
| 158.00 | 1.00 | 1.00  | 2.00 | .00  | .00  | 5.00  | 2.00 | 1.00 |
| 159.00 | 1.00 | 1.00  | 1.00 | .00  | .00  | 5.00  | 2.00 | 1.00 |
| 160.00 | 1.00 | 3.00  | 1.00 | .00  | .00  | -1.00 | 2.00 | 1.00 |
| 161.00 | 1.00 | 1.00  | 2.00 | .00  | .00  | 5.00  | 2.00 | 1.00 |
| 162.00 | 1.00 | 75.00 | 2.00 | .00  | .00  | 5.00  | 2.00 | 5.00 |
| 163.00 | 2.00 | 23.00 | 1.00 | 1.00 | 3.00 | 1.00  | 2.00 | 7.00 |
| 164.00 | 1.00 | 52.00 | 2.00 | .00  | .00  | 7.00  | 2.00 | 5.00 |
| 165.00 | 1.00 | 1.00  | 2.00 | .00  | .00  | 7.00  | 2.00 | 5.00 |
| 166.00 | 1.00 | 23.00 | 1.00 | 1.00 | 2.00 | 7.00  | 1.00 | .00  |
| 167.00 | 2.00 | 1.00  | 2.00 | .00  | .00  | 7.00  | 2.00 | 5.00 |
| 168.00 | 1.00 | 25.00 | 1.00 | 1.00 | 2.00 | 5.00  | 2.00 | 4.00 |

|        |      |       |      |      |      |       |      |      |
|--------|------|-------|------|------|------|-------|------|------|
| 169.00 | 1.00 | 1.00  | 2.00 | .00  | .00  | 7.00  | 2.00 | 1.00 |
| 170.00 | 2.00 | 1.00  | 1.00 | .00  | .00  | 7.00  | 2.00 | 1.00 |
| 171.00 | 1.00 | 1.00  | 2.00 | .00  | .00  | 7.00  | 2.00 | 1.00 |
| 172.00 | 1.00 | 1.00  | 2.00 | .00  | .00  | 7.00  | 2.00 | 5.00 |
| 173.00 | 2.00 | 1.00  | 2.00 | .00  | .00  | 7.00  | 2.00 | 5.00 |
| 174.00 | 1.00 | 1.00  | 1.00 | .00  | .00  | 7.00  | 2.00 | 5.00 |
| 175.00 | 1.00 | 1.00  | 2.00 | .00  | .00  | 7.00  | 2.00 | 1.00 |
| 176.00 | 1.00 | 1.00  | 2.00 | .00  | .00  | 7.00  | 2.00 | 5.00 |
| 177.00 | 1.00 | 1.00  | 2.00 | .00  | .00  | 7.00  | 2.00 | 5.00 |
| 178.00 | 1.00 | 1.00  | 2.00 | .00  | .00  | 7.00  | 2.00 | 5.00 |
| 179.00 | 2.00 | 1.00  | 2.00 | .00  | .00  | 7.00  | 2.00 | 5.00 |
| 180.00 | 1.00 | 1.00  | 2.00 | .00  | .00  | 7.00  | 2.00 | 5.00 |
| 181.00 | 1.00 | 1.00  | 2.00 | .00  | .00  | 7.00  | 2.00 | 1.00 |
| 182.00 | 1.00 | 1.00  | 1.00 | .00  | .00  | 7.00  | 2.00 | 1.00 |
| 183.00 | 1.00 | 1.00  | 1.00 | .00  | .00  | 3.00  | 2.00 | 1.00 |
| 184.00 | 1.00 | 1.00  | 2.00 | .00  | .00  | 5.00  | 2.00 | 1.00 |
| 185.00 | 1.00 | 1.00  | 2.00 | .00  | .00  | 7.00  | 2.00 | 1.00 |
| 186.00 | 1.00 | 1.00  | 2.00 | .00  | .00  | 7.00  | 2.00 | 1.00 |
| 187.00 | 1.00 | 73.00 | 2.00 | .00  | .00  | 5.00  | 2.00 | 4.00 |
| 188.00 | 1.00 | 1.00  | 1.00 | 1.00 | 1.00 | 7.00  | 2.00 | 1.00 |
| 189.00 | 1.00 | 1.00  | 2.00 | .00  | .00  | 7.00  | 2.00 | 5.00 |
| 190.00 | 1.00 | 3.00  | 2.00 | .00  | .00  | 7.00  | 2.00 | 1.00 |
| 191.00 | 2.00 | 23.00 | 1.00 | 1.00 | 3.00 | 1.00  | 1.00 | .00  |
| 192.00 | 1.00 | 1.00  | 2.00 | 1.00 | 1.00 | 7.00  | 2.00 | 1.00 |
| 193.00 | 1.00 | 18.00 | 1.00 | 1.00 | 2.00 | 6.00  | 2.00 | 3.00 |
| 194.00 | 1.00 | 1.00  | 2.00 | .00  | .00  | -1.00 | 2.00 | 1.00 |
| 195.00 | 2.00 | 1.00  | 1.00 | .00  | .00  | 7.00  | 2.00 | 5.00 |
| 196.00 | 1.00 | 30.00 | 2.00 | .00  | .00  | 5.00  | 2.00 | 4.00 |
| 197.00 | 1.00 | 1.00  | 1.00 | 1.00 | 3.00 | 1.00  | 2.00 | 5.00 |
| 198.00 | 2.00 | 1.00  | 1.00 | 1.00 | 3.00 | 6.00  | 2.00 | 5.00 |
| 199.00 | 2.00 | 20.00 | 1.00 | 1.00 | 2.00 | 6.00  | 1.00 | .00  |
| 200.00 | 1.00 | 1.00  | 2.00 | .00  | .00  | 7.00  | 2.00 | 1.00 |
| 201.00 | 1.00 | 1.00  | 2.00 | .00  | .00  | 7.00  | 2.00 | 1.00 |
| 202.00 | 2.00 | 1.00  | 2.00 | .00  | .00  | 7.00  | 2.00 | 1.00 |
| 203.00 | 1.00 | 37.00 | 1.00 | 1.00 | 3.00 | 1.00  | 1.00 | .00  |
| 204.00 | 2.00 | 1.00  | 2.00 | .00  | .00  | 7.00  | 2.00 | 5.00 |
| 205.00 | 1.00 | 1.00  | 2.00 | .00  | .00  | 7.00  | 2.00 | 1.00 |
| 207.00 | 2.00 | 1.00  | 1.00 | 1.00 | 2.00 | 3.00  | 2.00 | 1.00 |
| 208.00 | 2.00 | 18.00 | 2.00 | 1.00 | 3.00 | 6.00  | 1.00 | .00  |
| 209.00 | 2.00 | 1.00  | 2.00 | .00  | .00  | 7.00  | 2.00 | 1.00 |
| 210.00 | 1.00 | 1.00  | 1.00 | .00  | .00  | -1.00 | 2.00 | 1.00 |
| 211.00 | 1.00 | 1.00  | 1.00 | .00  | .00  | 7.00  | 2.00 | 1.00 |
| 212.00 | 2.00 | 1.00  | 1.00 | .00  | .00  | 7.00  | 2.00 | 1.00 |
| 213.00 | 1.00 | 1.00  | 2.00 | .00  | .00  | 7.00  | 2.00 | 1.00 |
| 214.00 | 2.00 | 28.00 | 1.00 | 1.00 | 3.00 | 1.00  | 1.00 | .00  |
| 215.00 | 1.00 | 1.00  | 2.00 | .00  | .00  | 3.00  | 2.00 | 1.00 |
| 216.00 | 1.00 | 1.00  | 2.00 | .00  | .00  | 7.00  | 2.00 | 5.00 |
| 217.00 | 1.00 | 9.00  | 2.00 | .00  | .00  | 7.00  | 2.00 | 1.00 |
| 218.00 | 1.00 | 1.00  | 2.00 | .00  | .00  | 7.00  | 2.00 | 5.00 |
| 219.00 | 2.00 | 5.00  | 2.00 | .00  | .00  | 7.00  | 2.00 | 1.00 |
| 220.00 | 1.00 | 1.00  | 2.00 | .00  | .00  | 7.00  | 2.00 | 1.00 |
| 221.00 | 1.00 | 1.00  | 1.00 | .00  | .00  | 7.00  | 2.00 | 5.00 |
| 222.00 | 1.00 | 1.00  | 1.00 | .00  | .00  | 7.00  | 2.00 | 1.00 |
| 223.00 | 1.00 | 1.00  | 2.00 | .00  | .00  | 7.00  | 2.00 | 5.00 |
| 224.00 | 2.00 | 1.00  | 2.00 | .00  | .00  | 7.00  | 2.00 | 1.00 |
| 225.00 | 1.00 | 1.00  | 2.00 | .00  | .00  | 7.00  | 2.00 | 1.00 |

|        |         |      |       |      |      |      |       |      |      |
|--------|---------|------|-------|------|------|------|-------|------|------|
| 226.00 |         | 1.00 | 1.00  | 2.00 | .00  | .00  | 7.00  | 2.00 | 1.00 |
| 227.00 |         | 2.00 | 7.00  | 2.00 | 1.00 | 2.00 | 5.00  | 2.00 | 1.00 |
| 228.00 |         | 2.00 | 1.00  | 2.00 | .00  | .00  | 3.00  | 2.00 | 5.00 |
| 229.00 |         | 2.00 | 1.00  | 2.00 | .00  | .00  | 7.00  | 2.00 | 5.00 |
| 230.00 |         | 2.00 | 1.00  | 2.00 | .00  | .00  | 7.00  | 2.00 | 1.00 |
| 231.00 |         | 2.00 | 23.00 | 1.00 | 1.00 | 3.00 | 1.00  | 1.00 | .00  |
| 232.00 |         | 1.00 | 1.00  | 2.00 | .00  | .00  | 7.00  | 2.00 | 1.00 |
| 233.00 |         | 1.00 | 1.00  | 1.00 | .00  | .00  | 7.00  | 2.00 | 1.00 |
| 234.00 |         | 2.00 | 1.00  | 2.00 | .00  | .00  | 7.00  | 2.00 | 1.00 |
| 235.00 |         | 2.00 | 1.00  | 2.00 | .00  | .00  | 5.00  | 2.00 | 1.00 |
| 236.00 |         | 1.00 | 1.00  | 1.00 | 1.00 | 3.00 | 1.00  | 2.00 | 5.00 |
| 237.00 |         | 1.00 | 1.00  | 2.00 | .00  | .00  | 5.00  | 2.00 | 1.00 |
| 238.00 |         | 1.00 | 1.00  | 1.00 | .00  | .00  | 7.00  | 2.00 | 1.00 |
| 239.00 |         | 2.00 | 1.00  | 1.00 | .00  | .00  | 7.00  | 2.00 | 1.00 |
| 240.00 | 816.00  | 2.00 | 1.00  | 1.00 | .00  | .00  | 7.00  | 2.00 | 5.00 |
| 241.00 | 828.00  | 1.00 | 1.00  | 2.00 | .00  | .00  | 7.00  | 2.00 | 6.00 |
| 242.00 | 829.00  | 1.00 | 1.00  | 2.00 | .00  | .00  | 7.00  | 2.00 | 5.00 |
| 243.00 | 833.00  | 1.00 | 1.00  | 1.00 | .00  | .00  | 7.00  | 2.00 | 5.00 |
| 244.00 | 847.00  | 1.00 | 10.00 | 1.00 | 1.00 | 1.00 | 6.00  | 2.00 | 1.00 |
| 245.00 | 871.00  | 1.00 | 26.00 | 1.00 | 1.00 | 3.00 | 1.00  | 1.00 | .00  |
| 246.00 | 859.00  | 2.00 | 28.00 | 1.00 | .00  | .00  | 3.00  | 2.00 | 2.00 |
| 247.00 | 889.00  | 1.00 | 60.00 | 2.00 | .00  | .00  | 5.00  | 2.00 | 5.00 |
| 248.00 | 952.00  | 1.00 | 18.00 | 2.00 | 1.00 | 2.00 | 6.00  | 2.00 | 3.00 |
| 249.00 | 974.00  | 2.00 | 26.00 | 2.00 | .00  | .00  | 3.00  | 2.00 | 3.00 |
| 250.00 | 1034.00 | 2.00 | 20.00 | 2.00 | .00  | .00  | 3.00  | 2.00 | 4.00 |
| 251.00 | 1042.00 | 2.00 | 27.00 | 2.00 | .00  | .00  | 3.00  | 2.00 | 2.00 |
| 252.00 | 1051.00 | 1.00 | 10.00 | 1.00 | 1.00 | 1.00 | 6.00  | 2.00 | 1.00 |
| 253.00 | 1055.00 | 2.00 | 37.00 | 2.00 | .00  | .00  | 5.00  | 2.00 | 2.00 |
| 254.00 | 1066.00 | 2.00 | 32.00 | 2.00 | .00  | .00  | 5.00  | 2.00 | 2.00 |
| 255.00 | 1103.00 | 1.00 | 14.00 | 1.00 | 1.00 | 1.00 | 6.00  | 2.00 | 1.00 |
| 256.00 | 1081.00 | 2.00 | 28.00 | 1.00 | 1.00 | 2.00 | 3.00  | 2.00 | 2.00 |
| 257.00 |         | 2.00 | 22.00 | 1.00 | 1.00 | 1.00 | 6.00  | 2.00 | 2.00 |
| 258.00 | 1116.00 | 1.00 | 8.00  | 1.00 | 1.00 | 1.00 | 6.00  | 2.00 | 1.00 |
| 259.00 | 1112.00 | 1.00 | 45.00 | 2.00 | .00  | .00  | 5.00  | 2.00 | 4.00 |
| 260.00 | 1157.00 | 1.00 | 21.00 | 2.00 | 1.00 | 2.00 | 6.00  | 2.00 | 4.00 |
| 261.00 | 1174.00 | 2.00 | 20.00 | 1.00 | 1.00 | 2.00 | 6.00  | 1.00 | .00  |
| 262.00 | 1155.00 | 2.00 | 35.00 | 2.00 | .00  | .00  | 3.00  | 2.00 | 3.00 |
| 263.00 | 1193.00 | 2.00 | 27.00 | 2.00 | 1.00 | 2.00 | 3.00  | 2.00 | 2.00 |
| 264.00 | 1202.00 | 2.00 | 9.00  | 2.00 | .00  | .00  | 7.00  | 2.00 | 1.00 |
| 265.00 | 1199.00 | 1.00 | 20.00 | 2.00 | .00  | .00  | 5.00  | 2.00 | 4.00 |
| 1.00   |         | 2.00 | 1.00  | 2.00 | .00  | .00  | 5.00  | 2.00 | 1.00 |
| 2.00   |         | 2.00 | 4.00  | 2.00 | .00  | .00  |       | 2.00 | 1.00 |
| 3.00   |         | 1.00 | 14.00 | 2.00 | .00  | 3.00 | 5.00  | 2.00 | 1.00 |
| 4.00   |         | 2.00 | 1.00  | 2.00 | .00  | .00  | 5.00  | 2.00 | 1.00 |
| 5.00   |         | 2.00 | 20.00 | 1.00 | 1.00 | 3.00 | 1.00  | 1.00 | .00  |
| 6.00   |         | 2.00 | 30.00 | 1.00 | 1.00 | 3.00 | 1.00  | 1.00 | .00  |
| 7.00   |         | 2.00 | 25.00 | 2.00 | .00  | .00  | 5.00  | 2.00 | 4.00 |
| 8.00   |         | 2.00 | 17.00 | 2.00 | .00  | .00  | 5.00  | 2.00 | 4.00 |
| 9.00   |         | 1.00 | 9.00  | 1.00 | 1.00 | 1.00 | 6.00  | 2.00 | 1.00 |
| 10.00  |         | 2.00 | 10.00 | 2.00 | 1.00 | 1.00 | 6.00  | 2.00 | 1.00 |
| 11.00  |         | 1.00 | 25.00 | 2.00 | 1.00 | 2.00 | 5.00  | 1.00 | 7.00 |
| 12.00  |         | 2.00 | 9.00  | 1.00 | 1.00 | 1.00 | 6.00  | 2.00 | 1.00 |
| 13.00  |         | 2.00 | 12.00 | 1.00 | 1.00 | 1.00 | 6.00  | 2.00 | 1.00 |
| 14.00  |         | 2.00 | 12.00 | 2.00 | .00  | .00  | 5.00  | 2.00 | 5.00 |
| 15.00  |         | 2.00 | 2.00  | 2.00 | .00  | .00  | 5.00  | 2.00 | 5.00 |
| 16.00  |         | 2.00 | 26.00 | 1.00 | 1.00 | 2.00 | -1.00 | 1.00 | .00  |

|       |      |       |      |      |      |       |      |      |
|-------|------|-------|------|------|------|-------|------|------|
| 17.00 | 1.00 | 1.00  | 2.00 | .00  | .00  | 5.00  | 2.00 | 5.00 |
| 18.00 | 1.00 | 13.00 | 2.00 | 1.00 | 1.00 | 6.00  | 2.00 | 4.00 |
| 19.00 | 1.00 | 24.00 | 1.00 | 1.00 | 3.00 | 1.00  | 1.00 | .00  |
| 20.00 | 2.00 | 30.00 | 1.00 | 1.00 | 3.00 | 1.00  | 1.00 | .00  |
| 21.00 | 2.00 | 1.00  | 1.00 | 1.00 | 3.00 | 1.00  | 2.00 | 1.00 |
| 22.00 | 2.00 | 7.00  | 2.00 | 1.00 | 1.00 | 6.00  | 2.00 | 1.00 |
| 23.00 | 2.00 | 14.00 | 2.00 | 1.00 | 1.00 | 6.00  | 2.00 | 1.00 |
| 24.00 | 2.00 | 30.00 | 2.00 | .00  | .00  | 3.00  | 1.00 | .00  |
| 25.00 | 1.00 | 25.00 | 1.00 | 1.00 | 3.00 | 1.00  | 1.00 | .00  |
| 26.00 | 1.00 | 1.00  | 1.00 | 1.00 | 2.00 | 1.00  | 2.00 | 1.00 |
| 27.00 | 1.00 | 28.00 | 1.00 | 1.00 | 3.00 | 1.00  | 2.00 | 4.00 |
| 28.00 | 2.00 | 38.00 | 1.00 | 1.00 | 3.00 | 2.00  | 1.00 | .00  |
| 29.00 | 1.00 | 1.00  | 1.00 | .00  | .00  | -1.00 | 2.00 | 1.00 |
| 30.00 | 2.00 | 4.00  | 1.00 | .00  | .00  | -1.00 | 2.00 | 1.00 |
| 31.00 | 1.00 | 1.00  | 1.00 | .00  | .00  |       | 2.00 | 1.00 |
| 32.00 | 2.00 | 32.00 | 2.00 | .00  | .00  | 3.00  | 1.00 | .00  |
| 33.00 | 2.00 | 23.00 | 2.00 | .00  | .00  | 3.00  | 1.00 | .00  |
| 34.00 | 2.00 | 32.00 | 2.00 | .00  | .00  | 3.00  | 1.00 | .00  |
| 35.00 | 2.00 | 14.00 | 1.00 | 1.00 | 1.00 | 6.00  | 2.00 | 1.00 |
| 36.00 | 2.00 | 23.00 | 1.00 | 1.00 | 3.00 | 6.00  | 1.00 | .00  |
| 37.00 | 2.00 | 23.00 | 1.00 | 1.00 | 3.00 | 6.00  | 1.00 | .00  |
| 38.00 | 2.00 | 23.00 | 1.00 | 1.00 | 3.00 | 6.00  | 1.00 | .00  |
| 39.00 | 1.00 | 1.00  | 1.00 | .00  | .00  |       | 2.00 | 1.00 |
| 40.00 | 2.00 | 2.00  | 2.00 | .00  | .00  |       | 2.00 | 1.00 |
| 41.00 | 2.00 | 10.00 | 1.00 | 1.00 | 1.00 | 6.00  | 2.00 | 1.00 |
| 42.00 | 1.00 | 10.00 | 2.00 | .00  | .00  | 5.00  | 2.00 | 1.00 |
| 43.00 | 1.00 | 1.00  | 1.00 | .00  | .00  |       | 2.00 | 1.00 |
| 44.00 | 1.00 | 1.00  | 2.00 | .00  | .00  |       | 2.00 | 5.00 |
| 45.00 | 1.00 | 15.00 | 1.00 | 1.00 | 3.00 | 1.00  | 1.00 | .00  |
| 46.00 | 2.00 | 30.00 | 2.00 | .00  | .00  | 3.00  | 2.00 | 4.00 |
| 47.00 | 2.00 | 35.00 | 1.00 | 1.00 | 3.00 | 1.00  | 1.00 | .00  |
| 48.00 | 2.00 | 1.00  | 1.00 | 1.00 | 3.00 | 2.00  | 1.00 | .00  |
| 49.00 | 1.00 | 13.00 | 2.00 | 1.00 | 1.00 | 6.00  | 2.00 | 1.00 |
| 50.00 | 2.00 | 2.00  | 1.00 | 1.00 | 3.00 | 1.00  | 1.00 | .00  |
| 51.00 | 2.00 | 28.00 | 1.00 | 1.00 | 3.00 | 2.00  | 1.00 | .00  |
| 52.00 | 2.00 | 28.00 | 1.00 | 1.00 | 3.00 | 2.00  | 1.00 | .00  |
| 53.00 | 2.00 | 28.00 | 1.00 | 1.00 | 3.00 | 1.00  | 1.00 | .00  |
| 54.00 | 1.00 | 1.00  | 2.00 | .00  | .00  | 3.00  | 2.00 | 5.00 |
| 55.00 | 2.00 | 35.00 | 1.00 | 1.00 | 3.00 | 1.00  | 2.00 | 4.00 |
| 56.00 | 2.00 | 27.00 | 2.00 | .00  | .00  | 3.00  | 2.00 | 4.00 |
| 57.00 | 1.00 | 18.00 | 2.00 | 1.00 | 2.00 | 6.00  | 2.00 | 4.00 |
| 58.00 | 2.00 | 21.00 | 2.00 | .00  | .00  | 3.00  | 2.00 | 4.00 |
| 59.00 | 2.00 | 23.00 | 2.00 | .00  | .00  | 3.00  | 2.00 | 4.00 |
| 60.00 | 1.00 | 30.00 | 1.00 | 1.00 | 3.00 | 1.00  | 2.00 | 4.00 |
| 61.00 | 2.00 | 8.00  | 1.00 | .00  | .00  | 3.00  | 2.00 | 5.00 |
| 62.00 | 1.00 | 13.00 | 2.00 | 1.00 | 1.00 | 6.00  | 2.00 | 1.00 |
| 63.00 | 2.00 | 86.00 | 1.00 | .00  | .00  | 3.00  | 2.00 | 4.00 |
| 64.00 | 2.00 | 20.00 | 2.00 | .00  | .00  | 3.00  | 2.00 | 4.00 |
| 65.00 | 1.00 | 30.00 | 2.00 | .00  | .00  | 2.00  | 2.00 | 4.00 |
| 66.00 | 1.00 | 4.00  | 1.00 | 1.00 | 3.00 | 1.00  | 1.00 | .00  |
| 67.00 | 1.00 | 1.00  | 1.00 | .00  | .00  | 3.00  | 2.00 | 1.00 |
| 68.00 | 1.00 | 30.00 | 2.00 | 1.00 | 3.00 | 1.00  | 1.00 | .00  |
| 69.00 | 1.00 | 30.00 | 1.00 | 1.00 | 3.00 | 1.00  | 2.00 | 3.00 |
| 70.00 | 1.00 | 8.00  | 2.00 | .00  | .00  | 5.00  | 2.00 | 1.00 |
| 71.00 | 2.00 | 2.00  | 2.00 | .00  | .00  | 5.00  | 2.00 | 1.00 |
| 72.00 | 2.00 | 2.00  | 2.00 | .00  | .00  | 5.00  | 2.00 | 1.00 |

|        |      |       |      |      |      |       |      |      |
|--------|------|-------|------|------|------|-------|------|------|
| 73.00  | 2.00 | 11.00 | 2.00 | 1.00 | 2.00 | 2.00  | 2.00 | 1.00 |
| 74.00  | 2.00 | 10.00 | 2.00 | .00  | .00  | 5.00  | 2.00 | 1.00 |
| 75.00  | 2.00 | 1.00  | 1.00 | 1.00 | 2.00 | 2.00  | 2.00 | 1.00 |
| 76.00  | 1.00 | 20.00 | 1.00 | 1.00 | 2.00 | 1.00  | 1.00 | .00  |
| 77.00  | 2.00 | 1.00  | 1.00 | 1.00 | 3.00 | 1.00  | 2.00 | 1.00 |
| 78.00  | 1.00 | 8.00  | 1.00 | 1.00 | 1.00 | 6.00  | 2.00 | 1.00 |
| 79.00  | 2.00 | 1.00  | 1.00 | 1.00 | 2.00 | 2.00  | 2.00 | 1.00 |
| 80.00  | 1.00 | 1.00  | 1.00 | 1.00 | 1.00 | 1.00  | 2.00 | 1.00 |
| 81.00  | 2.00 | 4.00  | 1.00 | 1.00 | 3.00 | 1.00  | 2.00 | 1.00 |
| 82.00  | 2.00 | 1.00  | 2.00 | .00  | .00  | 5.00  | 2.00 | 1.00 |
| 83.00  | 2.00 | 2.00  | 1.00 | 1.00 | 3.00 | 1.00  | 2.00 | 1.00 |
| 84.00  | 2.00 | 20.00 | 1.00 | 1.00 | 2.00 | 2.00  | 1.00 | .00  |
| 85.00  | 1.00 | 18.00 | 2.00 | 1.00 | 2.00 | 4.00  | 2.00 | 4.00 |
| 86.00  | 1.00 | 28.00 | 2.00 | 1.00 | 1.00 | 5.00  | 2.00 | 4.00 |
| 87.00  | 2.00 | 12.00 | 1.00 | 1.00 | 1.00 | 6.00  | 2.00 | 1.00 |
| 88.00  | 1.00 | 1.00  | 1.00 | 1.00 | 2.00 | 2.00  | 2.00 | 1.00 |
| 89.00  | 2.00 | 21.00 | 1.00 | 1.00 | 3.00 | 6.00  | 2.00 | 4.00 |
| 90.00  | 1.00 | 1.00  | 1.00 | 1.00 | 3.00 | 2.00  | 2.00 | 1.00 |
| 91.00  | 1.00 | 20.00 | 1.00 | 1.00 | 1.00 | 4.00  | 2.00 | 4.00 |
| 92.00  | 2.00 | 1.00  | 1.00 | 1.00 | 2.00 | 2.00  | 2.00 | 1.00 |
| 93.00  | 2.00 | 2.00  | 1.00 | 1.00 | 2.00 | 3.00  | 2.00 | 1.00 |
| 94.00  | 1.00 | 1.00  | 1.00 | 1.00 | 3.00 | 1.00  | 2.00 | 1.00 |
| 95.00  | 1.00 | 1.00  | 1.00 | 1.00 | 3.00 | 1.00  | 2.00 | 1.00 |
| 96.00  | 1.00 | 3.00  | 2.00 | 1.00 | 2.00 | 5.00  | 2.00 | 1.00 |
| 97.00  | 1.00 | 1.00  | 1.00 | 1.00 | 2.00 | 2.00  | 2.00 | 1.00 |
| 98.00  | 1.00 | 8.00  | 1.00 | 1.00 | 1.00 | 6.00  | 2.00 | 1.00 |
| 99.00  | 1.00 | 37.00 | 1.00 | 1.00 | 2.00 | 4.00  | 2.00 | 4.00 |
| 100.00 | 1.00 | 18.00 | 2.00 | 1.00 | 2.00 | 6.00  | 2.00 | 4.00 |
| 101.00 | 1.00 | 68.00 | 2.00 | .00  | .00  | 5.00  | 2.00 | 4.00 |
| 102.00 | 2.00 | 1.00  | 1.00 | 1.00 | 2.00 | 2.00  | 2.00 | 5.00 |
| 104.00 | 1.00 | 30.00 | 1.00 | 1.00 | 3.00 | 1.00  | 2.00 | 4.00 |
| 105.00 | 2.00 | 1.00  | 2.00 | .00  | .00  | 3.00  | 2.00 | 1.00 |
| 106.00 | 1.00 | 4.00  | 1.00 | 1.00 | 3.00 | 1.00  | 2.00 | 1.00 |
| 107.00 | 1.00 | 15.00 | 2.00 | 1.00 | 1.00 | 6.00  | 2.00 | 1.00 |
| 108.00 | 1.00 | 1.00  | 1.00 | 1.00 | 3.00 | 1.00  | 2.00 | 1.00 |
| 109.00 | 1.00 | 1.00  | 1.00 | .00  | .00  | 3.00  | 2.00 | 1.00 |
| 110.00 | 2.00 | 1.00  | 2.00 | .00  | .00  | 5.00  | 2.00 | 1.00 |
| 111.00 | 2.00 | 1.00  | 2.00 | 1.00 | 2.00 | 2.00  | 2.00 | 5.00 |
| 112.00 | 1.00 | 1.00  | 2.00 | .00  | .00  | 5.00  | 2.00 | 5.00 |
| 113.00 | 2.00 | 8.00  | 2.00 | .00  | .00  | 5.00  | 2.00 | 1.00 |
| 114.00 | 1.00 | 35.00 | 1.00 | 1.00 | 3.00 | 1.00  | 2.00 | 4.00 |
| 115.00 | 2.00 | 1.00  | 1.00 | 1.00 | 3.00 | 1.00  | 2.00 | 1.00 |
| 116.00 | 1.00 | 4.00  | 1.00 | 1.00 | 3.00 | 1.00  | 2.00 | 5.00 |
| 117.00 | 1.00 | 1.00  | 2.00 | .00  | .00  | 5.00  | 2.00 | 1.00 |
| 118.00 | 2.00 | 1.00  | 2.00 | .00  | .00  | 5.00  | 2.00 | 1.00 |
| 119.00 | 1.00 | 27.00 | 1.00 | 1.00 | 2.00 | 4.00  | 2.00 | 1.00 |
| 120.00 | 1.00 | 42.00 | 2.00 | .00  | .00  | -1.00 | 2.00 | 4.00 |
| 121.00 | 1.00 | 13.00 | 2.00 | 1.00 | 1.00 | 6.00  | 2.00 | 1.00 |
| 122.00 | 2.00 | 1.00  | 1.00 | 1.00 | 3.00 | 1.00  | 2.00 | 1.00 |
| 123.00 | 1.00 | 22.00 | 2.00 | .00  | .00  | 5.00  | 2.00 | 4.00 |
| 124.00 | 2.00 | 11.00 | 2.00 | 1.00 | 1.00 | 6.00  | 1.00 | .00  |
| 125.00 | 2.00 | 11.00 | 2.00 | 1.00 | 1.00 | 6.00  | 2.00 | 1.00 |
| 126.00 | 2.00 | 5.00  | 1.00 | 1.00 | 3.00 | 7.00  | 2.00 | 1.00 |
| 127.00 | 2.00 | 1.00  | 2.00 | .00  | .00  | 5.00  | 2.00 | 1.00 |
| 128.00 | 1.00 | 22.00 | 1.00 | 1.00 | 2.00 | 6.00  | 2.00 | 4.00 |
| 129.00 | 1.00 | 10.00 | 1.00 | 1.00 | 1.00 | 6.00  | 2.00 | 1.00 |

|        |      |       |      |      |      |       |      |      |
|--------|------|-------|------|------|------|-------|------|------|
| 130.00 | 1.00 | 8.00  | 2.00 | 1.00 | 1.00 | 6.00  | 2.00 | 1.00 |
| 131.00 | 2.00 | 13.00 | 1.00 | 1.00 | 1.00 | 6.00  | 1.00 | .00  |
| 132.00 | 1.00 | 49.00 | 1.00 | 1.00 | 3.00 | 2.00  | 1.00 | .00  |
| 133.00 | 2.00 | 15.00 | 2.00 | 1.00 | 1.00 | 6.00  | 2.00 | 1.00 |
| 134.00 | 1.00 | 13.00 | 1.00 | 1.00 | 1.00 | 6.00  | 2.00 | 1.00 |
| 135.00 | 1.00 | 28.00 | 2.00 | 1.00 | 2.00 | 5.00  | 2.00 | 4.00 |
| 136.00 | 1.00 | 19.00 | 2.00 | 1.00 | 2.00 | 6.00  | 2.00 | 3.00 |
| 137.00 | 1.00 | 19.00 | 2.00 | 1.00 | 2.00 | 6.00  | 2.00 | 4.00 |
| 138.00 | 1.00 | 4.75  | 2.00 | .00  | .00  | -1.00 | 2.00 | 1.00 |
| 139.00 | 1.00 | 10.00 | 2.00 | 1.00 | 1.00 | 6.00  | 2.00 | 1.00 |
| 140.00 | 2.00 | 35.00 | 1.00 | 1.00 | 2.00 | 3.00  | 1.00 | .00  |
| 141.00 | 2.00 | 12.00 | 2.00 | 1.00 | 1.00 | 6.00  | 2.00 | 1.00 |
| 142.00 | 1.00 | 20.00 | 2.00 | 1.00 | 2.00 | 6.00  | 2.00 | 4.00 |
| 143.00 | 1.00 | 1.00  | 2.00 | .00  | .00  | 5.00  | 2.00 | 5.00 |
| 144.00 | 2.00 | 30.00 | 2.00 | 1.00 | 2.00 | 3.00  | 2.00 | 4.00 |
| 145.00 | 2.00 | 25.00 | 1.00 | 1.00 | 3.00 | 3.00  | 2.00 | 2.00 |
| 146.00 | 1.00 | 40.00 | 1.00 | .00  | .00  | 2.00  | 2.00 | 4.00 |
| 147.00 | 1.00 | 1.00  | 2.00 | .00  | .00  | 5.00  | 2.00 | 1.00 |
| 148.00 | 1.00 | 40.00 | 1.00 | 1.00 | 3.00 | 1.00  | 1.00 | .00  |
| 149.00 | 1.00 | 1.00  | 1.00 | .00  | .00  | 4.00  | 2.00 | 1.00 |
| 150.00 | 2.00 | 21.00 | 2.00 | 1.00 | 2.00 | 6.00  | 2.00 | 4.00 |
| 151.00 | 2.00 | 30.00 | 2.00 | 1.00 | 1.00 | 5.00  | 2.00 | 4.00 |
| 151.00 | 1.00 | 1.00  | 2.00 | .00  | .00  | 5.00  | 1.00 | .00  |
| 152.00 | 2.00 | 60.00 | 2.00 | .00  | .00  | 5.00  | 2.00 | 4.00 |
| 153.00 | 2.00 | 28.00 | 2.00 | 1.00 | 2.00 | 3.00  | 2.00 | 2.00 |
| 154.00 | 1.00 | 23.00 | 2.00 | 1.00 | 2.00 | 6.00  | 2.00 | 7.00 |
| 155.00 | 2.00 | 5.00  | 2.00 | .00  | .00  | 5.00  | 2.00 | 1.00 |
| 156.00 | 1.00 | 12.00 | 2.00 | 1.00 | 1.00 | 6.00  | 2.00 | 1.00 |
| 157.00 | 2.00 | 20.00 | 2.00 | 1.00 | 2.00 | 2.00  | 2.00 | 4.00 |
| 158.00 | 1.00 | 48.00 | 1.00 | 1.00 | 3.00 | 1.00  | 1.00 | .00  |
| 159.00 | 2.00 | 4.00  | 2.00 | .00  | .00  | 5.00  | 2.00 | 3.00 |
| 160.00 | 2.00 | 30.00 | 1.00 | 1.00 | 2.00 | 3.00  | 2.00 | 4.00 |
| 161.00 | 2.00 | 20.00 | 1.00 | 1.00 | 2.00 | 3.00  | 2.00 | 2.00 |
| 162.00 | 1.00 | 18.00 | 2.00 | 1.00 | 2.00 | 6.00  | 2.00 | 4.00 |
| 163.00 | 1.00 | 4.00  | 1.00 | 1.00 | 3.00 | 2.00  | 2.00 | 1.00 |
| 164.00 | 1.00 | 36.00 | 2.00 | .00  | .00  | 5.00  | 2.00 | 5.00 |
| 165.00 | 1.00 | 28.00 | 2.00 | .00  | .00  | 5.00  | 2.00 | 4.00 |
| 166.00 | 1.00 | 25.00 | 1.00 | 1.00 | 3.00 | 1.00  | 2.00 | 4.00 |
| 167.00 | 1.00 | 4.00  | 1.00 | .00  | .00  | -1.00 | 2.00 | 1.00 |
| 168.00 | 1.00 | 1.00  | 2.00 | .00  | .00  | 5.00  | 2.00 | 1.00 |
| 169.00 | 1.00 | 7.00  | 2.00 | 1.00 | 1.00 | 6.00  | 2.00 | 1.00 |
| 170.00 | 2.00 | 28.00 | 2.00 | .00  | .00  | 3.00  | 2.00 | 4.00 |
| 171.00 | 1.00 | 30.00 | 1.00 | 1.00 | 3.00 | 1.00  | 1.00 | .00  |
| 172.00 | 2.00 | 1.00  | 2.00 | .00  | .00  | -1.00 | 2.00 | 1.00 |
| 173.00 | 2.00 | 20.00 | 1.00 | 1.00 | 2.00 | 2.00  | 2.00 | 2.00 |
| 174.00 | 2.00 | 45.00 | 2.00 | .00  | .00  | 3.00  | 2.00 | 4.00 |
| 175.00 | 1.00 | 28.00 | 1.00 | 1.00 | 3.00 | 1.00  | 2.00 | 4.00 |
| 176.00 | 2.00 | 4.00  | 2.00 | .00  | .00  | -1.00 | 2.00 | 3.00 |
| 177.00 | 2.00 | 3.00  | 1.00 | .00  | .00  | -1.00 | 2.00 | 6.00 |
| 178.00 | 2.00 | 25.00 | 2.00 | .00  | .00  | 3.00  | 2.00 | 4.00 |
| 179.00 | 2.00 | 26.00 | 1.00 | 1.00 | 3.00 | 1.00  | 2.00 | 4.00 |
| 180.00 | 2.00 | 24.00 | 2.00 | .00  | .00  | 3.00  | 2.00 | 2.00 |
| 181.00 | 1.00 | 1.00  | 2.00 | .00  | .00  | 5.00  | 2.00 | 1.00 |
| 182.00 | 1.00 | 5.00  | 2.00 | .00  | .00  | 3.00  | 2.00 | 1.00 |
| 183.00 | 2.00 | 41.00 | 1.00 | 1.00 | .00  | 1.00  | 1.00 | .00  |
| 184.00 | 1.00 | 25.00 | 2.00 | .00  | .00  | 5.00  | 2.00 | 4.00 |



|        |        |      |       |      |      |      |      |      |      |
|--------|--------|------|-------|------|------|------|------|------|------|
| 185.00 |        | 1.00 | 16.00 | 1.00 | 1.00 | 2.00 | 6.00 | 2.00 | 4.00 |
| 186.00 |        | 2.00 | 32.00 | 1.00 | 1.00 | 3.00 | 1.00 | 1.00 | .00  |
| 187.00 |        | 2.00 | 9.00  | 1.00 | 1.00 | 1.00 | 6.00 | 2.00 | 1.00 |
| 188.00 |        | 1.00 | 1.00  | 1.00 | 1.00 | 3.00 | 1.00 | 2.00 | 1.00 |
| 189.00 |        | 2.00 | 18.00 | 2.00 | 1.00 | 2.00 | 6.00 | 2.00 | 4.00 |
| 190.00 |        | 2.00 | 20.00 | 2.00 | .00  | .00  | 3.00 | 2.00 | 4.00 |
| 191.00 |        | 2.00 | 1.00  | 2.00 | .00  | .00  | 5.00 | 2.00 | 1.00 |
| 192.00 |        | 2.00 | 28.00 | 1.00 | 1.00 | 3.00 | 1.00 | 2.00 | 4.00 |
| 193.00 |        | 2.00 | 20.00 | 2.00 | .00  | .00  | 5.00 | 2.00 | 4.00 |
| 194.00 | 355.00 | 1.00 | 65.00 | 2.00 | 1.00 | 1.00 | 5.00 | 2.00 | 4.00 |
| 195.00 | 349.00 | 1.00 | 17.00 | 2.00 | 1.00 | 2.00 | 6.00 | 2.00 | 4.00 |
| 196.00 | 352.00 | 1.00 | 4.00  | 1.00 | .00  | .00  | 7.00 | 2.00 | 1.00 |
| 197.00 | 360.00 | 1.00 | 4.00  | 1.00 | .00  | .00  | 7.00 | 2.00 | 1.00 |
| 198.00 | 342.00 | 1.00 | 16.00 | 2.00 | 1.00 | 1.00 | 6.00 | 2.00 | 1.00 |
| 199.00 | 334.00 | 2.00 | 20.00 | 1.00 | 1.00 | 2.00 | 6.00 | 2.00 | 4.00 |
| 200.00 | 335.00 | 2.00 | 23.00 | 1.00 | 1.00 | 3.00 | 1.00 | 2.00 | 7.00 |
| 201.00 | 392.00 | 1.00 | 1.00  | 1.00 | .00  | .00  | 7.00 | 2.00 | 5.00 |
| 202.00 | 364.00 | 1.00 | 3.00  | 1.00 | .00  | .00  | 7.00 | 2.00 | 1.00 |
| 203.00 | 369.00 | 1.00 | 23.00 | 2.00 | 1.00 | 3.00 | 1.00 | 2.00 | 7.00 |
| 204.00 | 372.00 | 1.00 | 32.00 | 2.00 | 1.00 | 2.00 | 3.00 | 2.00 | 4.00 |
| 205.00 | 377.00 | 1.00 | 1.00  | 1.00 | .00  | .00  | 7.00 | 2.00 | 5.00 |
| 206.00 | 388.00 | 1.00 | 50.00 | 2.00 | .00  | .00  | 5.00 | 2.00 | 5.00 |
| 207.00 | 415.00 | 1.00 | 12.00 | 2.00 | .00  | .00  | 7.00 | 2.00 | 1.00 |
| 208.00 | 397.00 | 2.00 | 40.00 | 2.00 | .00  | .00  | 5.00 | 2.00 | 4.00 |
| 209.00 | 396.00 | 1.00 | 25.00 | 2.00 | 1.00 | 3.00 | 1.00 | 2.00 | 4.00 |
| 210.00 | 426.00 | 1.00 | 27.00 | 2.00 | 1.00 | 2.00 | 2.00 | 1.00 | .00  |
| 211.00 | 425.00 | 2.00 | 21.00 | 1.00 | 1.00 | 2.00 | 6.00 | 1.00 | .00  |
| 212.00 | 344.00 | 2.00 | 50.00 | 1.00 | .00  | .00  | 3.00 | 1.00 | .00  |
| 213.00 | 410.00 | 1.00 | 60.00 | 2.00 | 1.00 | 2.00 | 5.00 | 2.00 | 4.00 |
| 214.00 | 443.00 | 2.00 | 24.00 | 1.00 | 1.00 | 3.00 | 1.00 | 1.00 | .00  |
| 215.00 | 456.00 | 2.00 | 1.00  | 2.00 | .00  | .00  | 7.00 | 1.00 | .00  |
| 216.00 | 461.00 | 2.00 | 3.00  | 1.00 | .00  | .00  | 7.00 | 2.00 | 1.00 |
| 217.00 | 452.00 | 1.00 | 24.00 | 1.00 | 1.00 | 3.00 | 1.00 | 2.00 | 4.00 |
| 218.00 | 468.00 | 1.00 | 14.00 | 1.00 | 1.00 | 1.00 | 6.00 | 1.00 | .00  |
| 219.00 | 471.00 | 1.00 | 45.00 | 1.00 | 1.00 | 3.00 | 1.00 | 1.00 | .00  |
| 220.00 | 455.00 | 1.00 | 2.00  | 1.00 | .00  | .00  | 7.00 | 2.00 | 1.00 |
| 221.00 | 466.00 | 1.00 | 14.00 | 2.00 | 1.00 | 1.00 | 6.00 | 1.00 | 7.00 |
| 222.00 | 462.00 | 1.00 | 50.00 | 2.00 | .00  | .00  | 5.00 | 2.00 | 4.00 |
| 223.00 | 774.00 | 2.00 | 28.00 | 2.00 | .00  | .00  | 3.00 | 2.00 | 5.00 |
| 224.00 | 484.00 | 2.00 | 4.00  | 2.00 | .00  | .00  | 7.00 | 2.00 | 1.00 |
| 225.00 | 488.00 | 2.00 | 38.00 | 2.00 | .00  | .00  | 3.00 | 2.00 | 4.00 |
| 226.00 | 504.00 | 2.00 | 28.00 | 1.00 | 1.00 | 3.00 | 1.00 | 1.00 | 7.00 |
| 227.00 | 507.00 | 1.00 | 35.00 | 2.00 | .00  | .00  | 5.00 | 2.00 | 4.00 |
| 228.00 | 532.00 | 2.00 | 3.00  | 1.00 | .00  | .00  | 7.00 | 2.00 | 1.00 |
| 229.00 | 524.00 | 2.00 | 22.00 | 1.00 | 1.00 | 3.00 | 1.00 | 1.00 | .00  |
| 230.00 | 533.00 | 2.00 | 8.00  | 1.00 | 1.00 | 1.00 | 6.00 | 2.00 | 1.00 |
| 231.00 | 511.00 | 1.00 | 1.00  | 2.00 | .00  | .00  | .00  | 2.00 | 1.00 |
| 232.00 | 512.00 | 1.00 | 12.00 | 2.00 | .00  | .00  | 7.00 | 2.00 | 1.00 |
| 233.00 | 513.00 | 1.00 | 12.00 | 2.00 | 1.00 | 1.00 | 6.00 | 2.00 | 1.00 |
| 234.00 | 514.00 | 1.00 | 35.00 | 2.00 | .00  | .00  | 5.00 | 2.00 | 5.00 |
| 235.00 | 518.00 | 1.00 | 26.00 | 2.00 | .00  | .00  | 5.00 | 2.00 | 4.00 |
| 236.00 | 530.00 | 1.00 | 18.00 | 2.00 | 1.00 | 2.00 | 6.00 | 2.00 | 7.00 |
| 237.00 | 531.00 | 2.00 | 8.00  | 2.00 | 1.00 | 1.00 | 6.00 | 2.00 | 1.00 |
| 238.00 | 536.00 | 1.00 | 1.00  | 2.00 | .00  | .00  | 7.00 | 2.00 | 5.00 |
| 239.00 | 538.00 | 1.00 | 28.00 | 2.00 | .00  | .00  | 5.00 | 2.00 | 4.00 |
| 240.00 | 567.00 | 1.00 | 30.00 | 2.00 | 1.00 | 2.00 | 6.00 | 2.00 | 4.00 |

|        |        |      |       |      |      |      |      |      |      |
|--------|--------|------|-------|------|------|------|------|------|------|
| 242.00 | 547.00 | 1.00 | 25.00 | 2.00 | .00  | .00  | 5.00 | 2.00 | 4.00 |
| 241.00 | 568.00 | 2.00 | 17.00 | 2.00 | .00  | .00  | 3.00 | 2.00 | 2.00 |
| 243.00 | 550.00 | 2.00 | 12.00 | 1.00 | 1.00 | 1.00 | 6.00 | 2.00 | 1.00 |
| 244.00 | 553.00 | 1.00 | 3.00  | 2.00 | .00  | .00  | .00  | 2.00 | 1.00 |
| 245.00 | 559.00 | 2.00 | 2.00  | 2.00 | .00  | .00  | .00  | 2.00 | 1.00 |
| 246.00 | 562.00 | 2.00 | 60.00 | 2.00 | .00  | .00  | 3.00 | 2.00 | 4.00 |
| 247.00 | 563.00 | 1.00 | 25.00 | 2.00 | .00  | .00  | 3.00 | 2.00 | 2.00 |
| 248.00 | 564.00 | 1.00 | 56.00 | 1.00 | 1.00 | 2.00 | 2.00 | 2.00 | 4.00 |
| 249.00 | 576.00 | 2.00 | 20.00 | 2.00 | 1.00 | 2.00 | 6.00 | 2.00 | 5.00 |
| 250.00 | 580.00 | 1.00 | 17.00 | 2.00 | 1.00 | 3.00 | 6.00 | 2.00 | 1.00 |
| 251.00 | 581.00 | 1.00 | 43.00 | 2.00 | 1.00 | 3.00 | 1.00 | 2.00 | 7.00 |
| 252.00 | 598.00 | 1.00 | 65.00 | 2.00 | .00  | .00  | 5.00 | 1.00 | 7.00 |
| 253.00 | 596.00 | 1.00 | 12.00 | 2.00 | 1.00 | 1.00 | .00  | 2.00 | 1.00 |
| 254.00 | 593.00 | 2.00 | 50.00 | 2.00 | .00  | .00  | 3.00 | 2.00 | 7.00 |
| 255.00 | 619.00 | 2.00 | 12.00 | 1.00 | 1.00 | 1.00 | .00  | 2.00 | 1.00 |
| 256.00 | 620.00 | 1.00 | 4.00  | 2.00 | .00  | .00  | .00  | 2.00 | 1.00 |
| 257.00 | 622.00 | 1.00 | 29.00 | 1.00 | 1.00 | 3.00 | 1.00 | 2.00 | 4.00 |
| 258.00 | 630.00 | 1.00 | 9.00  | 2.00 | 1.00 | 1.00 | .00  | 2.00 | 1.00 |
| 259.00 | 634.00 | 2.00 | 12.00 | 2.00 | 1.00 | 1.00 | .00  | 2.00 | 1.00 |
| 260.00 | 638.00 | 2.00 | 3.00  | 2.00 | .00  | .00  | .00  | 2.00 | 1.00 |
| 261.00 | 644.00 | 2.00 | 28.00 | 2.00 | .00  | .00  | 3.00 | 2.00 | 2.00 |
| 262.00 | 649.00 | 1.00 | 1.00  | 1.00 | .00  | .00  | .00  | 2.00 | 1.00 |
| 263.00 | 652.00 | 2.00 | 14.00 | 1.00 | 1.00 | 2.00 | .00  | 2.00 | 1.00 |
| 264.00 | 656.00 | 2.00 | 3.00  | 1.00 | .00  | .00  | .00  | 2.00 | 1.00 |
| 265.00 | 667.00 | 1.00 | 18.00 | 2.00 | .00  | .00  | 5.00 | 2.00 | 7.00 |
| 266.00 | 668.00 | 2.00 | 17.00 | 2.00 | .00  | .00  | 4.00 | 2.00 | 4.00 |
| 267.00 | 671.00 | 2.00 | 7.00  | 1.00 | .00  | .00  | 7.00 | 2.00 | 1.00 |
| 268.00 | 673.00 | 1.00 | 30.00 | 1.00 | 1.00 | 3.00 | 2.00 | 2.00 | 7.00 |
| 269.00 | 674.00 | 2.00 | 40.00 | 2.00 | 1.00 | 2.00 | 3.00 | 2.00 | 4.00 |

| sampl e organi smampi ci l l i n Eryt hr omyci n |       |      |      | CEF oxaci l l i n pencil l i n |      |      | Cl i  | AMC  | SXT  | Tt c |
|--------------------------------------------------|-------|------|------|--------------------------------|------|------|-------|------|------|------|
| 2.00                                             | 1.00  | 1.00 |      | 3.00                           |      |      |       | 1.00 | 1.00 | .00  |
| 2.00                                             | 1.00  |      |      |                                |      |      |       |      |      |      |
| 2.00                                             | 1.00  |      |      |                                |      |      |       |      |      |      |
| 2.00                                             | 1.00  | 1.00 |      | 3.00                           |      |      |       | 1.00 | 1.00 | .00  |
| 2.00                                             | 3.00  | 1.00 |      | 3.00                           |      |      |       | 1.00 | 1.00 | .00  |
| 2.00                                             | 1.00  | 1.00 |      | 3.00                           |      |      |       | 1.00 | 1.00 | .00  |
| 2.00                                             | 4.00  | 1.00 |      | 3.00                           |      |      |       | 1.00 | .00  | .00  |
| 2.00                                             | 5.00  | 1.00 |      | 3.00                           |      |      |       | 1.00 | 1.00 | 1.00 |
| 2.00                                             | 6.00  | 1.00 |      | 3.00                           |      |      |       | 1.00 | 1.00 | 1.00 |
| 2.00                                             | 5.00  |      |      |                                |      |      |       |      |      |      |
| 2.00                                             | 2.00  | 1.00 |      | 3.00                           |      |      |       | 1.00 | 1.00 | 1.00 |
| 1.00                                             | 2.00  | 1.00 |      | 3.00                           |      |      |       | 1.00 | 1.00 | 1.00 |
| 2.00                                             | 7.00  | 1.00 | 3.00 |                                | 3.00 | 3.00 | 1.00  |      | 1.00 | 1.00 |
| 2.00                                             | 5.00  | 1.00 |      | 3.00                           |      |      |       | 1.00 | 1.00 | .00  |
| 1.00                                             | 6.00  | 1.00 |      | 3.00                           |      |      |       | 1.00 | 1.00 | 1.00 |
| 2.00                                             | 8.00  |      |      |                                |      |      |       |      |      |      |
| 2.00                                             | 8.00  |      |      |                                |      |      |       |      |      |      |
| 2.00                                             | 9.00  |      |      |                                |      |      |       |      |      |      |
| 2.00                                             | 2.00  | 1.00 |      | 2.00                           |      |      |       | 1.00 | 1.00 | 1.00 |
| 2.00                                             | 8.00  |      | 3.00 |                                | 3.00 | 3.00 | 1.00  |      | 1.00 | 1.00 |
| 2.00                                             | 8.00  |      | 3.00 |                                | 3.00 | 3.00 | 1.00  |      | 1.00 | 1.00 |
| 2.00                                             | 10.00 | 1.00 |      | 3.00                           |      |      |       | 1.00 | 1.00 | 1.00 |
| 2.00                                             | 5.00  | 1.00 |      |                                |      |      |       | 1.00 | 1.00 | 1.00 |
| 2.00                                             | 9.00  |      | 3.00 |                                | 3.00 | 3.00 | 3.00  |      | 1.00 | 1.00 |
| 2.00                                             | 5.00  | 1.00 |      | 3.00                           |      |      |       | 1.00 | 1.00 | 1.00 |
| 1.00                                             | 6.00  | 1.00 |      | 3.00                           |      |      |       | 1.00 | 1.00 | 1.00 |
| 2.00                                             | 5.00  | 1.00 |      | 3.00                           |      |      |       | 1.00 | 1.00 | 1.00 |
| 2.00                                             | 11.00 | 1.00 |      |                                |      |      |       | 1.00 | 1.00 | 1.00 |
| 2.00                                             | 7.00  |      |      |                                |      |      |       |      |      |      |
| 2.00                                             | 12.00 | 1.00 |      | 3.00                           |      |      |       | 1.00 | 1.00 | 1.00 |
| 2.00                                             | 5.00  | 1.00 | 3.00 |                                |      |      |       | 1.00 | 1.00 | 1.00 |
| 2.00                                             | 8.00  |      | 3.00 |                                | 3.00 | 3.00 | 1.00  |      | 1.00 | 1.00 |
| 2.00                                             | 5.00  | 1.00 |      |                                |      |      | -1.00 | 1.00 | 1.00 | 1.00 |
| 2.00                                             | 8.00  |      | 3.00 |                                | 3.00 | 3.00 | 3.00  |      | 1.00 | 1.00 |
| 2.00                                             | 8.00  |      |      |                                |      |      |       |      |      |      |
| 2.00                                             | 11.00 | 1.00 |      |                                |      |      |       | 1.00 | 1.00 | 1.00 |
| 2.00                                             | 5.00  | 1.00 |      |                                |      |      |       | 1.00 | 1.00 | 1.00 |
| 2.00                                             | 7.00  |      |      |                                |      |      |       |      |      |      |
| 2.00                                             | 5.00  | 1.00 |      |                                |      |      |       | 1.00 | 1.00 | 1.00 |
| 1.00                                             | 5.00  | 1.00 |      |                                |      |      |       | 1.00 | 1.00 | 1.00 |
| 2.00                                             | 12.00 | 1.00 |      |                                |      |      |       | 1.00 | 1.00 | 1.00 |
| 2.00                                             | 8.00  |      | 3.00 |                                | 3.00 | 3.00 | 3.00  |      | 1.00 | 1.00 |
| 2.00                                             | 8.00  |      | 3.00 |                                | 3.00 | 3.00 | 3.00  |      | 1.00 | 1.00 |
| 2.00                                             | 14.00 | 1.00 |      |                                |      |      |       | .00  | 1.00 | 1.00 |
| 2.00                                             | 14.00 | 1.00 |      | 3.00                           |      |      |       | 1.00 | 1.00 | 1.00 |
| 3.00                                             | 7.00  | 1.00 | 3.00 |                                | 3.00 | 3.00 | 1.00  |      | .00  | 1.00 |
| 2.00                                             | 9.00  |      |      |                                |      |      |       |      |      |      |
| 2.00                                             | 14.00 | 1.00 |      |                                |      |      |       | 1.00 | 1.00 | 1.00 |
| 2.00                                             | 8.00  |      |      |                                |      |      |       |      |      |      |
| 2.00                                             | 8.00  |      |      |                                |      |      |       |      |      |      |
| 2.00                                             | 8.00  |      |      |                                |      |      |       |      |      |      |
| 2.00                                             | 7.00  |      |      |                                |      |      |       |      |      |      |
| 2.00                                             | 14.00 | 1.00 |      |                                |      |      |       | 1.00 | 1.00 | 1.00 |
| 2.00                                             | 8.00  |      |      |                                |      |      |       |      |      |      |
| 2.00                                             | 7.00  |      | 3.00 |                                | 3.00 | 3.00 | 3.00  |      | 1.00 | 1.00 |

|      |       |      |      |      |      |      |      |      |      |      |
|------|-------|------|------|------|------|------|------|------|------|------|
| 2.00 | 8.00  |      |      |      |      |      |      |      |      |      |
| 2.00 | 14.00 | 1.00 |      |      |      |      |      | 1.00 | .00  | .00  |
| 2.00 | 8.00  |      |      |      |      |      |      |      |      |      |
| 2.00 | 12.00 | 1.00 |      |      |      |      |      | 1.00 | 1.00 | 1.00 |
| 2.00 | 15.00 |      |      |      |      |      |      |      |      |      |
| 2.00 | 5.00  | 1.00 |      |      |      |      |      | 1.00 | 1.00 | 1.00 |
| 3.00 | 16.00 | 1.00 |      |      |      |      |      | 1.00 | 1.00 | 1.00 |
| 2.00 | 12.00 | 1.00 |      |      |      |      |      | 1.00 | 1.00 | 1.00 |
| 2.00 | 8.00  |      |      |      |      |      |      |      |      |      |
| 2.00 | 5.00  | 1.00 |      |      |      |      |      | 1.00 | 1.00 | 1.00 |
| 2.00 | 17.00 |      | 3.00 |      | 3.00 | 3.00 | 3.00 |      | 1.00 | 1.00 |
| 2.00 | 5.00  | 1.00 |      |      |      |      |      | 1.00 | 1.00 | 1.00 |
| 2.00 | 5.00  | 1.00 |      |      |      |      |      | 1.00 | 1.00 | 1.00 |
| 2.00 | 8.00  |      | 3.00 |      | 3.00 | 3.00 | 1.00 |      | 1.00 | 1.00 |
| 2.00 | 7.00  |      | 3.00 |      | 3.00 | 3.00 | 3.00 |      | 1.00 | .00  |
| 2.00 | 5.00  | 1.00 |      |      |      |      |      | 1.00 | 1.00 | 1.00 |
| 2.00 | 8.00  |      |      |      |      |      |      |      |      |      |
| 2.00 | 18.00 | 1.00 |      |      |      |      | 3.00 | 1.00 | 1.00 | .00  |
| 2.00 | 7.00  |      |      |      |      |      |      |      |      |      |
| 2.00 | 19.00 |      |      |      |      |      |      |      |      |      |
| 2.00 | 20.00 | 1.00 |      |      |      |      |      | 1.00 | 1.00 | .00  |
| 1.00 | 14.00 | 1.00 |      | 3.00 |      |      |      | 1.00 | .00  | .00  |
| 2.00 | 7.00  |      | 3.00 |      | 3.00 | 1.00 | 1.00 |      | 1.00 | 1.00 |
| 2.00 | 11.00 | 1.00 |      | 3.00 |      |      |      | 1.00 | 1.00 | 1.00 |
| 2.00 | 7.00  |      |      |      |      |      |      |      |      |      |
| 2.00 | 14.00 | 1.00 |      |      |      |      |      | 1.00 | 1.00 | 1.00 |
| 2.00 | 8.00  |      |      |      |      |      |      |      |      |      |
| 5.00 | 7.00  |      |      |      |      |      |      |      |      |      |
| 4.00 | 5.00  | 1.00 |      |      |      |      |      | 1.00 | 1.00 | 1.00 |
| 4.00 | 7.00  |      | 3.00 |      | 3.00 | 3.00 | 3.00 |      | 1.00 | 1.00 |
| 1.00 | 12.00 | 1.00 |      |      |      |      |      | 1.00 | .00  | 1.00 |
| 2.00 | 21.00 | 1.00 |      |      |      |      |      | 1.00 | 1.00 | 1.00 |
| 2.00 | 22.00 |      | 3.00 |      | 3.00 | 3.00 | 3.00 |      | 1.00 | 1.00 |
| 2.00 | 23.00 |      |      |      |      |      |      |      |      |      |
| 1.00 | 5.00  |      |      |      |      |      |      |      |      |      |
| 2.00 | 2.00  | 1.00 |      | 3.00 |      |      |      | 1.00 | 1.00 | 1.00 |
| 2.00 | 22.00 |      | 3.00 |      | 3.00 | 3.00 | 3.00 |      | 1.00 | .00  |
| 2.00 | 5.00  | 1.00 |      | 3.00 |      |      |      | 1.00 | 1.00 | 1.00 |
| 2.00 | 1.00  |      |      |      |      |      |      |      |      |      |
| 1.00 | 7.00  |      | 3.00 |      | 3.00 | 3.00 | 1.00 |      | 1.00 | 1.00 |
| 2.00 | 24.00 | .00  | 3.00 |      | 3.00 | 3.00 | 3.00 |      | 1.00 | 1.00 |
| 2.00 | 25.00 |      | 3.00 |      | 3.00 | 3.00 | 3.00 |      | .00  | 1.00 |
| 5.00 | 26.00 |      |      |      |      |      |      |      |      |      |
| 2.00 | 5.00  | 1.00 |      | 3.00 |      |      |      | 1.00 | 1.00 | 1.00 |
| 2.00 | 22.00 |      | 3.00 |      | 3.00 | 3.00 | 3.00 |      | 1.00 | 1.00 |
| 1.00 | 2.00  | 1.00 |      | 3.00 |      |      |      | 1.00 | 1.00 | 1.00 |
| 2.00 | 30.00 | 1.00 | 3.00 |      | 3.00 |      | 3.00 |      | 1.00 | .00  |
| 1.00 | 5.00  | 1.00 |      | 3.00 |      |      |      | 1.00 | 1.00 | 1.00 |
| 2.00 | 8.00  |      | 1.00 |      | 3.00 |      | 3.00 |      | .00  | .00  |
| 2.00 | 5.00  | 1.00 |      | 3.00 |      |      |      | 1.00 | 1.00 | 1.00 |
| 2.00 | 8.00  |      | 3.00 |      | 3.00 | 3.00 | 3.00 |      | 1.00 | 1.00 |
| 2.00 | 20.00 |      |      |      |      |      |      |      |      |      |
| 2.00 | 8.00  |      |      |      |      |      |      |      |      |      |
| 2.00 | 5.00  |      |      |      |      |      |      |      |      |      |
| 2.00 | 1.00  |      |      |      |      |      |      |      |      |      |
| 2.00 | 6.00  | 1.00 |      | 3.00 |      |      |      | 1.00 | 1.00 | 1.00 |

|      |       |      |      |      |      |      |      |      |
|------|-------|------|------|------|------|------|------|------|
| 2.00 | 5.00  | 1.00 |      | 3.00 |      | 1.00 | 1.00 | 1.00 |
| 1.00 | 6.00  |      |      |      |      |      |      |      |
| 2.00 | 20.00 |      |      |      |      |      |      |      |
| 1.00 | 5.00  | 1.00 |      | 3.00 |      | .00  | 1.00 | 1.00 |
| 2.00 | 7.00  |      |      |      |      |      |      |      |
| 2.00 | 1.00  |      |      |      |      |      |      |      |
| 3.00 | 7.00  |      |      |      |      |      |      |      |
| 3.00 | 7.00  |      |      |      |      |      |      |      |
| 5.00 | 7.00  |      |      |      |      |      |      |      |
| 2.00 | 19.00 |      |      |      |      |      |      |      |
| 2.00 | 7.00  |      |      |      |      |      |      |      |
| 1.00 | 6.00  | 1.00 |      | 3.00 |      | 1.00 | 1.00 | 1.00 |
| 2.00 | 5.00  | 1.00 |      | 3.00 |      | 1.00 | 1.00 | 1.00 |
| 2.00 | 5.00  | 1.00 |      | 3.00 |      | .00  | 1.00 | 1.00 |
| 1.00 | 6.00  |      |      |      |      |      |      |      |
| 2.00 | 5.00  | 1.00 |      | 3.00 |      | 1.00 | 1.00 | 1.00 |
| 2.00 | 5.00  | 1.00 |      | 3.00 |      | 1.00 | 1.00 | 1.00 |
| 2.00 | 5.00  |      |      |      |      |      |      |      |
| 2.00 | 19.00 |      |      |      |      |      |      |      |
| 2.00 | 7.00  |      |      |      |      |      |      |      |
| 2.00 | 7.00  |      |      |      |      |      |      |      |
| 2.00 | 15.00 | 1.00 |      |      |      | 1.00 | 1.00 | 1.00 |
| 2.00 | 5.00  | 1.00 |      | 3.00 |      | 1.00 | 1.00 | 1.00 |
| 1.00 | 1.00  | 1.00 |      | 3.00 |      | 1.00 | .00  | .00  |
| 1.00 | 32.00 |      |      |      |      |      |      |      |
| 2.00 | 1.00  |      |      |      |      |      |      |      |
| 4.00 | 12.00 |      |      |      |      |      |      |      |
| 2.00 | 5.00  | 1.00 |      |      |      | .00  | 1.00 | 1.00 |
| 1.00 | 6.00  |      |      |      |      |      |      |      |
| 2.00 | 5.00  | 1.00 |      | 3.00 |      | 1.00 | 1.00 | 1.00 |
| 2.00 | 5.00  |      |      |      |      |      |      |      |
| 2.00 | 5.00  | 1.00 |      | 3.00 |      | 1.00 | 1.00 | 1.00 |
| 2.00 | 2.00  | 1.00 |      | 3.00 |      | 1.00 | 1.00 | 1.00 |
| 1.00 | 6.00  | 1.00 |      | 3.00 |      | 1.00 | 1.00 | 1.00 |
| 2.00 | 7.00  |      |      |      |      |      |      |      |
| 2.00 | 11.00 |      |      |      |      |      |      |      |
| 2.00 | 5.00  | 1.00 |      | 3.00 |      | 1.00 | 1.00 | 1.00 |
| 1.00 | 19.00 |      |      |      |      |      |      |      |
| 2.00 | 5.00  | 1.00 |      | 3.00 |      | .00  | 1.00 | 1.00 |
| 4.00 | 7.00  |      |      |      |      |      |      |      |
| 1.00 | 3.00  | 1.00 |      | 3.00 |      | .00  | 1.00 | 1.00 |
| 1.00 | 6.00  | 1.00 |      | 1.00 |      | .00  | 1.00 | 1.00 |
| 2.00 | 5.00  | 1.00 |      | 3.00 |      | 1.00 | 1.00 | 1.00 |
| 2.00 | 1.00  | 1.00 |      |      |      | 1.00 | 1.00 | 1.00 |
| 2.00 | 5.00  | 1.00 |      | 3.00 |      | .00  | 1.00 | 1.00 |
| 2.00 | 5.00  | 1.00 |      | 3.00 |      | 1.00 | 1.00 | 1.00 |
| 2.00 | 2.00  | 1.00 |      | 3.00 |      | 1.00 | 1.00 | 1.00 |
| 2.00 | 5.00  | 1.00 |      | 3.00 |      | 1.00 | 1.00 | .00  |
| 1.00 | 11.00 | 1.00 |      | 3.00 |      | 1.00 | 1.00 | 1.00 |
| 3.00 | 12.00 |      |      |      |      |      |      |      |
| 1.00 | 19.00 |      |      |      |      |      |      |      |
| 2.00 | 5.00  | 1.00 |      |      |      | 1.00 | 1.00 | 1.00 |
| 2.00 | 6.00  | 1.00 |      |      |      | 1.00 | 1.00 | 1.00 |
| 4.00 | 20.00 |      |      |      |      |      |      |      |
| 2.00 | 5.00  | 1.00 |      |      |      | 1.00 | 1.00 | 1.00 |
| 2.00 | 7.00  |      | 1.00 |      | 3.00 | 3.00 | 3.00 | 1.00 |





|      |     |
|------|-----|
| 2.00 | .00 |
| 2.00 | .00 |
| 1.00 | .00 |
| 1.00 | .00 |
| 2.00 | .00 |
| 2.00 | .00 |
| 2.00 | .00 |
| 2.00 | .00 |
| 7.00 | .00 |
| 1.00 | .00 |
| 2.00 | .00 |
| 8.00 | .00 |
| 7.00 | .00 |
| 1.00 | .00 |
| 7.00 | .00 |
| 1.00 | .00 |
| 9.00 | .00 |
| 9.00 | .00 |
| 1.00 | .00 |
| 7.00 | .00 |
| 1.00 | .00 |
| 2.00 | .00 |
| 7.00 | .00 |
| 7.00 | .00 |
| 2.00 | .00 |
| 2.00 | .00 |
| 2.00 | .00 |
| 2.00 | .00 |
| 2.00 | .00 |
| 7.00 | .00 |
| 1.00 | .00 |
| 1.00 | .00 |
| 2.00 | .00 |
| 1.00 | .00 |
| 1.00 | .00 |
| 9.00 | .00 |
| 1.00 | .00 |
| 7.00 | .00 |
| 2.00 | .00 |
| 2.00 | .00 |
| 2.00 | .00 |
| 2.00 | .00 |
| 7.00 | .00 |
| 1.00 | .00 |
| 2.00 | .00 |
| 2.00 | .00 |
| 7.00 | .00 |
| 1.00 | .00 |
| 7.00 | .00 |
| 7.00 | .00 |
| 2.00 | .00 |
| 2.00 | .00 |
| 2.00 | .00 |
| 2.00 | .00 |



|      |     |
|------|-----|
| 2.00 | .00 |
| 2.00 | .00 |
| 2.00 | .00 |
| 8.00 | .00 |
| 2.00 | .00 |
| 2.00 | .00 |
| 2.00 | .00 |
| 2.00 | .00 |
| 1.00 | .00 |
| 2.00 | .00 |
| 7.00 | .00 |
| 1.00 | .00 |
| 2.00 | .00 |
| 2.00 | .00 |
| 1.00 | .00 |
| 2.00 | .00 |
| 2.00 | .00 |
| 1.00 | .00 |
| 2.00 | .00 |
| 7.00 | .00 |
| 1.00 | .00 |
| 1.00 | .00 |
| 7.00 | .00 |
| 7.00 | .00 |
| 7.00 | .00 |
| 1.00 | .00 |
| 2.00 | .00 |
| 2.00 | .00 |
| 2.00 | .00 |
| 2.00 | .00 |
| 2.00 | .00 |
| 2.00 | .00 |
| 7.00 | .00 |
| 2.00 | .00 |
| 2.00 | .00 |
| 2.00 | .00 |
| 2.00 | .00 |
| 2.00 | .00 |
| 7.00 | .00 |
| 2.00 | .00 |
| 7.00 | .00 |
| 7.00 | .00 |
| 7.00 | .00 |
| 1.00 | .00 |
| 1.00 | .00 |
| 2.00 | .00 |
| 1.00 | .00 |
| 1.00 | .00 |
| 7.00 | .00 |
| 7.00 | .00 |
| 2.00 | .00 |
| 2.00 | .00 |







| CI P | CAF  | GEN  | CFP  | CXM  | CRO  | CXT  | CAZ  | ESBL | Bact eri at ype |
|------|------|------|------|------|------|------|------|------|-----------------|
| 1.00 | 1.00 | 1.00 | 1.00 | 1.00 | 1.00 | 1.00 | 1.00 | 1.00 | 2.00            |
|      |      |      |      |      |      |      |      |      | 2.00            |
|      |      |      |      |      |      |      |      |      | 2.00            |
| 1.00 | .00  | 1.00 | 1.00 | 1.00 | 1.00 | 1.00 | 1.00 | 1.00 | 2.00            |
| .00  | 1.00 | 1.00 | 1.00 | 1.00 | 1.00 | .00  | 1.00 | .00  | 2.00            |
| 1.00 | .00  | 1.00 | 1.00 | 1.00 | 1.00 | 1.00 | 1.00 | 1.00 | 2.00            |
| .00  | 1.00 | 1.00 | 1.00 | 1.00 | 1.00 | 1.00 | 1.00 | 1.00 | 2.00            |
| .00  | 1.00 | 1.00 | 1.00 | 1.00 | 1.00 | .00  | 1.00 | 1.00 | 2.00            |
| 1.00 | 1.00 | 1.00 | 1.00 | 1.00 | 1.00 | 1.00 | 1.00 | 1.00 | 2.00            |
|      |      |      |      |      |      |      |      |      | 2.00            |
| 1.00 | 1.00 | 1.00 | 1.00 | 1.00 | 1.00 | 1.00 | 1.00 | 1.00 | 2.00            |
| 1.00 | 1.00 | 1.00 | 1.00 | 1.00 | 1.00 | 1.00 | 1.00 | 1.00 | 2.00            |
| 1.00 | 1.00 | 1.00 | 1.00 | 1.00 | 1.00 | 1.00 | 1.00 | 1.00 | 1.00            |
| .00  | 1.00 | 1.00 | 1.00 | 1.00 | 1.00 | .00  | 1.00 | 1.00 | 2.00            |
| 1.00 | 1.00 | 1.00 | 1.00 | 1.00 | 1.00 | 1.00 | 1.00 | 1.00 | 2.00            |
|      |      |      |      |      |      |      |      |      | 1.00            |
|      |      |      |      |      |      |      |      |      | 1.00            |
|      |      |      |      |      |      |      |      |      | 1.00            |
| .00  | 1.00 | 1.00 | 1.00 | 1.00 | 1.00 | 1.00 | 1.00 | 1.00 | 2.00            |
| .00  | 1.00 | 1.00 |      |      | 1.00 | .00  |      |      | 1.00            |
| 1.00 | 1.00 | 1.00 |      |      | 1.00 | 1.00 |      |      | 1.00            |
| .00  | .00  | 1.00 | 1.00 | 1.00 | 1.00 | .00  | 1.00 | .00  | 2.00            |
| 1.00 | 1.00 | 1.00 | 1.00 | 1.00 | 1.00 | 1.00 | 1.00 | 1.00 | 2.00            |
| 1.00 | 1.00 | 1.00 |      |      | 1.00 | 1.00 |      |      | 1.00            |
| .00  | 1.00 | 1.00 | 1.00 | 1.00 | 1.00 | .00  | 1.00 | 1.00 | 2.00            |
| 1.00 | .00  | .00  | 1.00 | 1.00 | 1.00 | 1.00 | 1.00 | 1.00 | 2.00            |
| 1.00 | 1.00 | 1.00 | 1.00 | 1.00 | 1.00 | 1.00 | 1.00 | 1.00 | 2.00            |
| 1.00 | 1.00 | 1.00 | 1.00 | 1.00 | 1.00 | 1.00 | 1.00 | 1.00 | 2.00            |
|      |      |      |      |      |      |      |      |      | 1.00            |
| .00  | .00  | 1.00 | 1.00 | 1.00 | 1.00 | .00  | 1.00 | 1.00 | 2.00            |
| 1.00 | 1.00 | 1.00 | 1.00 | 1.00 | 1.00 | 1.00 | 1.00 | 1.00 | 2.00            |
| 1.00 | .00  | 1.00 |      |      | 1.00 | .00  |      |      | 1.00            |
| 1.00 | 1.00 | 1.00 | 1.00 | 1.00 | 1.00 | 1.00 | 1.00 | 1.00 | 2.00            |
| 1.00 | 1.00 | 1.00 | 1.00 | 1.00 | 1.00 | 1.00 | 1.00 | 1.00 | 2.00            |
| 1.00 | 1.00 | 1.00 | 1.00 | 1.00 | 1.00 | 1.00 | 1.00 | 1.00 | 2.00            |
| .00  | 1.00 | .00  |      |      | 1.00 | 1.00 |      |      | 1.00            |
| 1.00 | .00  | .00  |      |      | 1.00 | .00  |      |      | 1.00            |
| 1.00 | 1.00 | 1.00 | 1.00 | .00  | 1.00 | .00  | 1.00 | .00  | 2.00            |
| 1.00 | .00  | 1.00 | 1.00 | 1.00 | 1.00 | .00  | 1.00 | 1.00 | 2.00            |
| .00  | .00  | .00  |      |      | 1.00 | .00  |      |      | 1.00            |
|      |      |      |      |      |      |      |      |      | 1.00            |
| .00  | .00  | .00  | 1.00 | 1.00 | 1.00 | .00  | 1.00 | 1.00 | 2.00            |
|      |      |      |      |      |      |      |      |      | 1.00            |
|      |      |      |      |      |      |      |      |      | 1.00            |
|      |      |      |      |      |      |      |      |      | 1.00            |
| 1.00 | .00  | .00  | 1.00 | 1.00 | 1.00 | 1.00 | 1.00 | 1.00 | 2.00            |
|      |      |      |      |      |      |      |      |      | 1.00            |
| .00  | 1.00 | 1.00 |      |      | 1.00 | .00  |      |      | 1.00            |

|      |      |      |      |      |      |      |      |      |      |
|------|------|------|------|------|------|------|------|------|------|
|      |      |      |      |      |      |      |      |      | 1.00 |
| .00  | .00  | 1.00 | 1.00 | 1.00 | 1.00 | 1.00 | 1.00 | 1.00 | 2.00 |
|      |      |      |      |      |      |      |      |      | 1.00 |
| 1.00 | 1.00 | 1.00 | 1.00 | 1.00 | 1.00 | .00  | 1.00 | 1.00 | 2.00 |
|      |      |      |      |      |      |      |      |      | 2.00 |
| 1.00 | 1.00 | 1.00 | 1.00 | 1.00 | 1.00 | .00  | 1.00 | 1.00 | 2.00 |
| 1.00 | 1.00 | .00  | 1.00 | .00  | 1.00 | .00  | .00  | .00  | 2.00 |
| 1.00 | 1.00 | 1.00 | 1.00 | 1.00 | 1.00 | .00  | 1.00 | 1.00 | 2.00 |
|      |      |      |      |      |      |      |      |      | 1.00 |
| 1.00 | .00  | 1.00 | 1.00 | 1.00 | 1.00 | .00  | 1.00 | 1.00 | 2.00 |
| .00  | 1.00 | 1.00 |      |      | 1.00 | .00  |      |      | 1.00 |
| 1.00 | 1.00 | 1.00 | 1.00 | 1.00 | 1.00 | 1.00 | 1.00 | 1.00 | 2.00 |
| .00  | .00  | 1.00 | 1.00 | 1.00 | 1.00 | .00  | 1.00 | 1.00 | 2.00 |
| .00  | .00  | .00  |      |      | .00  | 1.00 |      |      | 1.00 |
| 1.00 | .00  | 1.00 |      |      | .00  | 1.00 |      |      | 1.00 |
| .00  | .00  | 1.00 | 1.00 | 1.00 | 1.00 | 1.00 | 1.00 | 1.00 | 2.00 |
|      |      |      |      |      |      |      |      |      | 1.00 |
| 1.00 | .00  | 1.00 | 1.00 | 1.00 | 1.00 | 1.00 | 1.00 | .00  | 2.00 |
|      |      |      |      |      |      |      |      |      | 1.00 |
|      |      |      |      |      |      |      |      |      | 1.00 |
| 1.00 | 1.00 | 1.00 | 1.00 | 1.00 | 1.00 | 1.00 | 1.00 | 1.00 | 2.00 |
| .00  | .00  | .00  | 1.00 | 1.00 | .00  | .00  | 1.00 | 1.00 | 2.00 |
| .00  | .00  | 1.00 |      |      | 1.00 | .00  |      |      | 1.00 |
| 1.00 | 1.00 | 1.00 | 1.00 | 1.00 | 1.00 | .00  | 1.00 | .00  | 2.00 |
|      |      |      |      |      |      |      |      |      | 1.00 |
| 1.00 | .00  | 1.00 | 1.00 | 1.00 | 1.00 | .00  | 1.00 | .00  | 2.00 |
|      |      |      |      |      |      |      |      |      | 1.00 |
|      |      |      |      |      |      |      |      |      | 1.00 |
| 1.00 | 1.00 | 1.00 | 1.00 | 1.00 | 1.00 | 1.00 | 1.00 | 1.00 | 2.00 |
| 1.00 | 1.00 | 1.00 |      |      | 1.00 | 1.00 |      |      | 1.00 |
| .00  | 1.00 | 1.00 | 1.00 | 1.00 | 1.00 | 1.00 | 1.00 | 1.00 | 2.00 |
| 1.00 | .00  | 1.00 | 1.00 | 1.00 | 1.00 | 1.00 | 1.00 | .00  | 2.00 |
| 1.00 | 1.00 | 1.00 |      |      | 1.00 | 1.00 |      |      | 1.00 |
|      |      |      |      |      |      |      |      |      | 2.00 |
| .00  | .00  | 1.00 | 1.00 | 1.00 | 1.00 | .00  | 1.00 | .00  | 2.00 |
| 1.00 | 1.00 | 1.00 |      |      | 1.00 | .00  |      |      | 1.00 |
| 1.00 | 1.00 | 1.00 | 1.00 | 1.00 | 1.00 | 1.00 | 1.00 | 1.00 | 2.00 |
|      |      |      |      |      |      |      |      |      | 2.00 |
| 1.00 | .00  | .00  |      |      | 1.00 | .00  |      |      | 1.00 |
| .00  | 1.00 | .00  |      |      | .00  | .00  |      |      | 1.00 |
| .00  | 1.00 | .00  |      |      | 1.00 | .00  |      |      | 1.00 |
|      |      |      |      |      |      |      |      |      | 2.00 |
| 1.00 | .00  | 1.00 | 1.00 | 1.00 | 1.00 | 1.00 | 1.00 | 1.00 | 2.00 |
| 1.00 | .00  | 1.00 |      |      | 1.00 | 1.00 |      |      | 1.00 |
| .00  | 1.00 | 1.00 | 1.00 | 1.00 | 1.00 | 1.00 | 1.00 | 1.00 | 2.00 |
| 1.00 | 1.00 | 1.00 |      |      | 1.00 | 1.00 |      |      | 2.00 |
| 1.00 | 1.00 | 1.00 | 1.00 | 1.00 | 1.00 | 1.00 | 1.00 | 1.00 | 2.00 |
| .00  | 1.00 | 1.00 |      |      | 1.00 | 1.00 |      |      | 1.00 |
| 1.00 | .00  | 1.00 | 1.00 | 1.00 | 1.00 | .00  | 1.00 | .00  | 2.00 |
| .00  | 1.00 | .00  |      |      | 1.00 | 1.00 |      |      | 1.00 |
|      |      |      |      |      |      |      |      |      | 2.00 |
|      |      |      |      |      |      |      |      |      | 1.00 |
|      |      |      |      |      |      |      |      |      | 2.00 |
|      |      |      |      |      |      |      |      |      | 2.00 |
| 1.00 | 1.00 | 1.00 | 1.00 | 1.00 | 1.00 | .00  | 1.00 | 1.00 | 2.00 |

|      |      |      |      |      |      |      |      |      |      |
|------|------|------|------|------|------|------|------|------|------|
| .00  | 1.00 | 1.00 | 1.00 | 1.00 | 1.00 | .00  | 1.00 | 1.00 | 2.00 |
|      |      |      |      |      |      |      |      |      | 2.00 |
|      |      |      |      |      |      |      |      |      | 2.00 |
| .00  | 1.00 | 1.00 | 1.00 | 1.00 | 1.00 | .00  | 1.00 | 1.00 | 2.00 |
|      |      |      |      |      |      |      |      |      | 1.00 |
|      |      |      |      |      |      |      |      |      | 2.00 |
|      |      |      |      |      |      |      |      |      | 1.00 |
|      |      |      |      |      |      |      |      |      | 1.00 |
|      |      |      |      |      |      |      |      |      | 1.00 |
|      |      |      |      |      |      |      |      |      | 1.00 |
| 1.00 | .00  | 1.00 | 1.00 | 1.00 | 1.00 | 1.00 | 1.00 | 1.00 | 2.00 |
| 1.00 | 1.00 | 1.00 | 1.00 | 1.00 | 1.00 | 1.00 | 1.00 | 1.00 | 2.00 |
| .00  | 1.00 | 1.00 | 1.00 | 1.00 | 1.00 | .00  | 1.00 | 1.00 | 2.00 |
|      |      |      |      |      |      |      |      |      | 2.00 |
| .00  | 1.00 | 1.00 | 1.00 | 1.00 | 1.00 | .00  | 1.00 | 1.00 | 2.00 |
| .00  | 1.00 | 1.00 | 1.00 | 1.00 | 1.00 | .00  | 1.00 | .00  | 2.00 |
|      |      |      |      |      |      |      |      |      | 2.00 |
|      |      |      |      |      |      |      |      |      | 1.00 |
|      |      |      |      |      |      |      |      |      | 1.00 |
|      |      |      |      |      |      |      |      |      | 1.00 |
| 1.00 | 1.00 | .00  | .00  | .00  | 1.00 | 1.00 | .00  | 1.00 | 2.00 |
| .00  | 1.00 | 1.00 | 1.00 | 1.00 | 1.00 | .00  | 1.00 | 1.00 | 2.00 |
| .00  | 1.00 | .00  | 1.00 | 1.00 | 1.00 | 1.00 | 1.00 | .00  | 2.00 |
|      |      |      |      |      |      |      |      |      | 2.00 |
|      |      |      |      |      |      |      |      |      | 2.00 |
|      |      |      |      |      |      |      |      |      | 2.00 |
| .00  | 1.00 | 1.00 | 1.00 | 1.00 | 1.00 | 1.00 | 1.00 | 1.00 | 2.00 |
|      |      |      |      |      |      |      |      |      | 2.00 |
| .00  | .00  | 1.00 | 1.00 | 1.00 | 1.00 | 1.00 | 1.00 | 1.00 | 2.00 |
|      |      |      |      |      |      |      |      |      | 2.00 |
| .00  | 1.00 | 1.00 | 1.00 | 1.00 | 1.00 | .00  | 1.00 | 1.00 | 2.00 |
| .00  | 1.00 | 1.00 | 1.00 | 1.00 | 1.00 | .00  | 1.00 | 1.00 | 2.00 |
| 1.00 | .00  | .00  | 1.00 | 1.00 | 1.00 | 1.00 | 1.00 | 1.00 | 2.00 |
|      |      |      |      |      |      |      |      |      | 1.00 |
|      |      |      |      |      |      |      |      |      | 2.00 |
| .00  | .00  | 1.00 | 1.00 | 1.00 | 1.00 | .00  | 1.00 | 1.00 | 2.00 |
|      |      |      |      |      |      |      |      |      | 1.00 |
| .00  | 1.00 | 1.00 | 1.00 | 1.00 | 1.00 | .00  | 1.00 | 1.00 | 2.00 |
| .00  | 1.00 | 1.00 | .00  | .00  | .00  | .00  | .00  | .00  | 2.00 |
| .00  | 1.00 | 1.00 | .00  | .00  | .00  | .00  | 1.00 | .00  | 2.00 |
| .00  | 1.00 | 1.00 | 1.00 | 1.00 | 1.00 | .00  | 1.00 | 1.00 | 2.00 |
| .00  | 1.00 | 1.00 | 1.00 | 1.00 | 1.00 | 1.00 | 1.00 | 1.00 | 2.00 |
| .00  | .00  | 1.00 | 1.00 | 1.00 | .00  | 1.00 | 1.00 | 1.00 | 2.00 |
| .00  | 1.00 | 1.00 | 1.00 | 1.00 | 1.00 | .00  | 1.00 | 1.00 | 2.00 |
| .00  | 1.00 | 1.00 | 1.00 | 1.00 | 1.00 | .00  | 1.00 | 1.00 | 2.00 |
| .00  | .00  | 1.00 | 1.00 | 1.00 | 1.00 | 1.00 | 1.00 | 1.00 | 2.00 |
| .00  | 1.00 | 1.00 | 1.00 | 1.00 | 1.00 | 1.00 | 1.00 | 1.00 | 2.00 |
|      |      |      |      |      |      |      |      |      | 2.00 |
|      |      |      |      |      |      |      |      |      | 1.00 |
| .00  | 1.00 | 1.00 | 1.00 | 1.00 | 1.00 | .00  | 1.00 | 1.00 | 2.00 |
| .00  | 1.00 | 1.00 | 1.00 | 1.00 | 1.00 | .00  | 1.00 | 1.00 | 2.00 |
|      |      |      |      |      |      |      |      |      | 2.00 |
| .00  | 1.00 | 1.00 | 1.00 | 1.00 | 1.00 | .00  | 1.00 | 1.00 | 2.00 |
| .00  | .00  | 1.00 |      |      | 1.00 | .00  |      |      | 1.00 |





|      |      |      |      |      |      |      |      |      |      |
|------|------|------|------|------|------|------|------|------|------|
|      |      |      |      |      |      |      |      |      | 1.00 |
|      |      |      |      |      |      |      |      |      | 1.00 |
| 1.00 | 1.00 | .00  | 1.00 | 1.00 | 1.00 | 1.00 | 1.00 | 1.00 | 2.00 |
| 1.00 | 1.00 | 1.00 | 1.00 | 1.00 | 1.00 | 1.00 | 1.00 | 1.00 | 2.00 |
| .00  | .00  | .00  | 1.00 | 1.00 | 1.00 | 1.00 | 1.00 | 1.00 | 2.00 |
| .00  | 1.00 | 1.00 | 1.00 | 1.00 | .00  | .00  | 1.00 | 1.00 | 2.00 |
| .00  | 1.00 | 1.00 | 1.00 | 1.00 | 1.00 | 1.00 | 1.00 | 1.00 | 2.00 |
| 1.00 | 1.00 | 1.00 | 1.00 | 1.00 | 1.00 | 1.00 | 1.00 | 1.00 | 2.00 |
| 1.00 | 1.00 | 1.00 | 1.00 | 1.00 | 1.00 | 1.00 | 1.00 | 1.00 | 2.00 |
|      |      |      |      |      |      |      |      |      | 2.00 |
| 1.00 | .00  | 1.00 | 1.00 | 1.00 | 1.00 | .00  | 1.00 | 1.00 | 2.00 |
| 1.00 | 1.00 | 1.00 | 1.00 | 1.00 | 1.00 | .00  | 1.00 | 1.00 | 2.00 |
|      |      |      |      |      |      |      |      |      | 2.00 |
|      |      |      |      |      |      |      |      |      | 2.00 |
|      |      |      |      |      |      |      |      |      | 2.00 |
|      |      |      |      |      |      |      |      |      | 2.00 |
| 1.00 | 1.00 | 1.00 | 1.00 | 1.00 | 1.00 | 1.00 | 1.00 | 1.00 | 2.00 |
|      |      |      |      |      |      |      |      |      | 2.00 |
|      |      |      |      |      |      |      |      |      | 2.00 |
| 1.00 | 1.00 | 1.00 | 1.00 | 1.00 | 1.00 | 1.00 | 1.00 | 1.00 | 2.00 |
| .00  | 1.00 | 1.00 | 1.00 | 1.00 | 1.00 | 1.00 | 1.00 | .00  | 2.00 |
|      |      |      |      |      |      |      |      |      | 1.00 |
| 1.00 | 1.00 | 1.00 |      |      | 1.00 | 1.00 |      |      | 1.00 |
| .00  | .00  | .00  | .00  | .00  | .00  | .00  | .00  | .00  | 2.00 |
| 1.00 | .00  | 1.00 |      |      | 1.00 | 1.00 |      |      | 1.00 |
| 1.00 | 1.00 | 1.00 |      |      | 1.00 | 1.00 |      |      | 1.00 |
| .00  | .00  | .00  | .00  | 1.00 | .00  | .00  | 1.00 | .00  | 2.00 |
| .00  | .00  | 1.00 | 1.00 | 1.00 | 1.00 | 1.00 | 1.00 | 1.00 | 2.00 |
| .00  | 1.00 | 1.00 |      |      | 1.00 | 1.00 |      |      | 1.00 |
| .00  | 1.00 | 1.00 | 1.00 | 1.00 | 1.00 | 1.00 | 1.00 | 1.00 | 2.00 |
| .00  | 1.00 | 1.00 | 1.00 | 1.00 | 1.00 | 1.00 | 1.00 | 1.00 | 2.00 |
| .00  | .00  | 1.00 | .00  | .00  | 1.00 | .00  | .00  | 1.00 | 2.00 |
| 1.00 | .00  | 1.00 | 1.00 | 1.00 | 1.00 | 1.00 | 1.00 | .00  | 2.00 |
| .00  | 1.00 | 1.00 |      |      | .00  | 1.00 |      |      | 1.00 |
|      |      |      |      |      |      |      |      |      | 2.00 |
|      |      |      |      |      |      |      |      |      | 1.00 |
| 1.00 | 1.00 | .00  |      |      | 1.00 | .00  |      |      | 1.00 |
| 1.00 | .00  | .00  |      |      | 1.00 | 1.00 |      |      | 1.00 |











| Bact er i al _i nf ect i on | Mer openum | mer ge_or gani sm | mer ge1 | MDR1 | MDR2 | R8   | R9   | R10  | R11  |
|-----------------------------|------------|-------------------|---------|------|------|------|------|------|------|
| 1.00                        | .00        | 1.00              | 1.00    | 1.00 | 1.00 | .00  | .00  | .00  | 1.00 |
| 1.00                        |            | 1.00              | 1.00    |      |      |      |      |      |      |
| 1.00                        |            | 1.00              | 1.00    |      |      |      |      |      |      |
| 1.00                        | .00        | 1.00              | 1.00    | 1.00 | 1.00 | .00  | .00  | 1.00 | .00  |
| 1.00                        | .00        | 3.00              | 3.00    | 1.00 | 1.00 | .00  | 1.00 | .00  | .00  |
| 1.00                        | 1.00       | 1.00              | 1.00    | 1.00 | 1.00 | .00  | .00  | 1.00 | .00  |
| 1.00                        | 1.00       | 3.00              | 3.00    | 1.00 | 1.00 | .00  | 1.00 | .00  | .00  |
| 1.00                        | .00        | 4.00              | 4.00    | 1.00 | 1.00 | .00  | .00  | 1.00 | .00  |
| 1.00                        | .00        | 5.00              | 5.00    | 1.00 | 1.00 | .00  | .00  | .00  | .00  |
| 1.00                        |            | 4.00              | 4.00    |      |      |      |      |      |      |
| 1.00                        | .00        | 2.00              | 2.00    | 1.00 | 1.00 | .00  | .00  | .00  | .00  |
| 1.00                        | .00        | 2.00              | 2.00    | 1.00 | 1.00 | .00  | .00  | .00  | .00  |
| 1.00                        |            | 6.00              | 6.00    |      |      |      |      |      |      |
| 1.00                        | 1.00       | 4.00              | 4.00    | 1.00 | 1.00 | .00  | 1.00 | .00  | .00  |
| 1.00                        | .00        | 5.00              | 5.00    | 1.00 | 1.00 | .00  | .00  | .00  | .00  |
| 1.00                        |            | 7.00              | 7.00    |      |      |      |      |      |      |
| 1.00                        |            | 7.00              | 7.00    |      |      |      |      |      |      |
| 1.00                        |            | 8.00              | 8.00    |      |      |      |      |      |      |
| 1.00                        | .00        | 2.00              | 2.00    | 1.00 | 1.00 | .00  | .00  | .00  | 1.00 |
| 1.00                        |            | 7.00              | 7.00    |      |      |      |      |      |      |
| 1.00                        |            | 7.00              | 7.00    |      |      |      |      |      |      |
| 1.00                        | .00        | 16.00             | 16.00   | 1.00 | 1.00 | .00  | 1.00 | .00  | .00  |
| 1.00                        | .00        | 4.00              | 4.00    | 1.00 | 1.00 | .00  | .00  | .00  | .00  |
| 1.00                        |            | 8.00              | 8.00    |      |      |      |      |      |      |
| 1.00                        | .00        | 4.00              | 4.00    | 1.00 | 1.00 | .00  | .00  | 1.00 | .00  |
| 1.00                        | .00        | 5.00              | 5.00    | 1.00 | 1.00 | .00  | .00  | 1.00 | .00  |
| 1.00                        | 1.00       | 4.00              | 4.00    | 1.00 | 1.00 | .00  | .00  | .00  | .00  |
| 1.00                        | .00        | 2.00              | 2.00    | 1.00 | 1.00 | .00  | .00  | .00  | .00  |
| 1.00                        |            | 6.00              | 6.00    |      |      |      |      |      |      |
| 1.00                        | .00        | 9.00              | 9.00    | 1.00 | 1.00 | .00  | 1.00 | .00  | .00  |
| 1.00                        | 1.00       | 4.00              | 4.00    | 1.00 | 1.00 | .00  | .00  | .00  | .00  |
| 1.00                        |            | 7.00              | 7.00    |      |      |      |      |      |      |
| 1.00                        | .00        | 4.00              | 4.00    | 1.00 | 1.00 | .00  | .00  | .00  | 1.00 |
| 1.00                        |            | 7.00              | 7.00    |      |      |      |      |      |      |
| 1.00                        |            | 7.00              | 7.00    |      |      |      |      |      |      |
| 1.00                        | 1.00       | 2.00              | 2.00    | 1.00 | 1.00 | .00  | .00  | .00  | .00  |
| 1.00                        | 1.00       | 4.00              | 4.00    | 1.00 | 1.00 | .00  | .00  | 1.00 | .00  |
| 1.00                        |            | 6.00              | 6.00    |      |      |      |      |      |      |
| 1.00                        | .00        | 4.00              | 4.00    | 1.00 | 1.00 | .00  | .00  | .00  | .00  |
| 1.00                        | .00        | 4.00              | 4.00    | 1.00 | 1.00 | .00  | .00  | .00  | 1.00 |
| 1.00                        | .00        | 9.00              | 9.00    | 1.00 | 1.00 | .00  | 1.00 | .00  | .00  |
| 1.00                        |            | 7.00              | 7.00    |      |      |      |      |      |      |
| 1.00                        |            | 7.00              | 7.00    |      |      |      |      |      |      |
| 1.00                        | .00        | 4.00              | 4.00    | 1.00 | 1.00 | .00  | 1.00 | .00  | .00  |
| 1.00                        | 1.00       | 4.00              | 4.00    | 1.00 | 1.00 | .00  | .00  | 1.00 | .00  |
| 1.00                        |            | 6.00              | 6.00    |      |      |      |      |      |      |
| 1.00                        |            | 8.00              | 8.00    |      |      |      |      |      |      |
| 1.00                        | .00        | 4.00              | 4.00    | 1.00 | 1.00 | 1.00 | .00  | .00  | .00  |
| 1.00                        |            | 7.00              | 7.00    |      |      |      |      |      |      |
| 1.00                        |            | 7.00              | 7.00    |      |      |      |      |      |      |
| 1.00                        |            | 7.00              | 7.00    |      |      |      |      |      |      |
| 1.00                        |            | 6.00              | 6.00    |      |      |      |      |      |      |
| 1.00                        | .00        | 4.00              | 4.00    | 1.00 | 1.00 | .00  | .00  | 1.00 | .00  |
| 1.00                        |            | 7.00              | 7.00    |      |      |      |      |      |      |
| 1.00                        |            | 6.00              | 6.00    |      |      |      |      |      |      |

|      |      |       |       |      |      |      |      |      |      |
|------|------|-------|-------|------|------|------|------|------|------|
| 1.00 |      | 7.00  | 7.00  |      |      |      |      |      |      |
| 1.00 | .00  | 4.00  | 4.00  | 1.00 | 1.00 | 1.00 | .00  | .00  | .00  |
| 1.00 |      | 7.00  | 7.00  |      |      |      |      |      |      |
| 1.00 | 1.00 | 9.00  | 9.00  | 1.00 | 1.00 | .00  | .00  | .00  | 1.00 |
| 1.00 |      | 4.00  | 4.00  |      |      |      |      |      |      |
| 1.00 | .00  | 4.00  | 4.00  | 1.00 | 1.00 | .00  | .00  | .00  | 1.00 |
| 1.00 | .00  | 10.00 | 10.00 | 1.00 | 1.00 | 1.00 | .00  | .00  | .00  |
| 1.00 | .00  | 9.00  | 9.00  | 1.00 | 1.00 | .00  | .00  | .00  | 1.00 |
| 1.00 |      | 7.00  | 7.00  |      |      |      |      |      |      |
| 1.00 | .00  | 4.00  | 4.00  | 1.00 | 1.00 | .00  | .00  | 1.00 | .00  |
| 1.00 |      | 8.00  | 8.00  |      |      |      |      |      |      |
| 1.00 | 1.00 | 4.00  | 4.00  | 1.00 | 1.00 | .00  | .00  | .00  | .00  |
| 1.00 | .00  | 4.00  | 4.00  | 1.00 | 1.00 | .00  | 1.00 | .00  | .00  |
| 1.00 |      | 7.00  | 7.00  |      |      |      |      |      |      |
| 1.00 |      | 6.00  | 6.00  |      |      |      |      |      |      |
| 1.00 | .00  | 4.00  | 4.00  | 1.00 | 1.00 | .00  | .00  | 1.00 | .00  |
| 1.00 |      | 7.00  | 7.00  |      |      |      |      |      |      |
| 1.00 | .00  | 11.00 | 11.00 | 1.00 | 1.00 | .00  | .00  | 1.00 | .00  |
| 1.00 |      | 6.00  | 6.00  |      |      |      |      |      |      |
| 1.00 |      | 8.00  | 8.00  |      |      |      |      |      |      |
| 1.00 | .00  | 12.00 | 12.00 | 1.00 | 1.00 | .00  | .00  | .00  | 1.00 |
| 1.00 | .00  | 4.00  | 4.00  | 1.00 | .00  | .00  | .00  | .00  | .00  |
| 1.00 |      | 6.00  | 6.00  |      |      |      |      |      |      |
| 1.00 | .00  | 2.00  | 2.00  | 1.00 | 1.00 | .00  | .00  | .00  | 1.00 |
| 1.00 |      | 6.00  | 6.00  |      |      |      |      |      |      |
| 1.00 | .00  | 4.00  | 4.00  | 1.00 | 1.00 | .00  | .00  | 1.00 | .00  |
| 1.00 |      | 7.00  | 7.00  |      |      |      |      |      |      |
| 1.00 |      | 6.00  | 6.00  |      |      |      |      |      |      |
| 1.00 | .00  | 4.00  | 4.00  | 1.00 | 1.00 | .00  | .00  | .00  | .00  |
| 1.00 |      | 6.00  | 6.00  |      |      |      |      |      |      |
| 1.00 | .00  | 9.00  | 9.00  | 1.00 | 1.00 | .00  | .00  | 1.00 | .00  |
| 1.00 | .00  | 12.00 | 12.00 | 1.00 | 1.00 | .00  | .00  | .00  | 1.00 |
| 1.00 |      | 7.00  | 7.00  |      |      |      |      |      |      |
| 1.00 |      | 7.00  | 7.00  |      |      |      |      |      |      |
| 1.00 |      | 4.00  | 4.00  |      |      |      |      |      |      |
| 1.00 | .00  | 2.00  | 2.00  | 1.00 | 1.00 | .00  | 1.00 | .00  | .00  |
| 1.00 |      | 7.00  | 7.00  |      |      |      |      |      |      |
| 1.00 | .00  | 4.00  | 4.00  | 1.00 | 1.00 | .00  | .00  | .00  | .00  |
| 1.00 |      | 1.00  | 1.00  |      |      |      |      |      |      |
| 1.00 |      | 6.00  | 6.00  |      |      |      |      |      |      |
| 1.00 |      | 7.00  | 7.00  |      |      |      |      |      |      |
| 1.00 |      | 7.00  | 7.00  |      |      |      |      |      |      |
| 1.00 |      | 13.00 | 13.00 |      |      |      |      |      |      |
| 1.00 | .00  | 4.00  | 4.00  | 1.00 | 1.00 | .00  | .00  | .00  | 1.00 |
| 1.00 |      | 7.00  | 7.00  |      |      |      |      |      |      |
| 1.00 | .00  | 2.00  | 2.00  | 1.00 | 1.00 | .00  | .00  | .00  | 1.00 |
| 1.00 |      | 14.00 | 14.00 |      |      |      |      |      |      |
| 1.00 | .00  | 4.00  | 4.00  | 1.00 | 1.00 | .00  | .00  | .00  | .00  |
| 1.00 |      | 7.00  | 7.00  |      |      |      |      |      |      |
| 1.00 | .00  | 4.00  | 4.00  | 1.00 | 1.00 | .00  | .00  | 1.00 | .00  |
| 1.00 |      | 7.00  | 7.00  |      |      |      |      |      |      |
| 1.00 |      | 12.00 | 12.00 |      |      |      |      |      |      |
| 1.00 |      | 7.00  | 7.00  |      |      |      |      |      |      |
| 1.00 |      | 4.00  | 4.00  |      |      |      |      |      |      |
| 1.00 |      | 1.00  | 1.00  |      |      |      |      |      |      |
| 1.00 | .00  | 5.00  | 5.00  | 1.00 | 1.00 | .00  | .00  | .00  | 1.00 |



|      |      |       |       |      |      |      |      |      |      |
|------|------|-------|-------|------|------|------|------|------|------|
| 1.00 | .00  | 4.00  | 4.00  | 1.00 | 1.00 | .00  | .00  | 1.00 | .00  |
| 1.00 |      | 5.00  | 5.00  |      |      |      |      |      |      |
| 1.00 |      | 12.00 | 12.00 |      |      |      |      |      |      |
| 1.00 | .00  | 4.00  | 4.00  | 1.00 | 1.00 | .00  | 1.00 | .00  | .00  |
| 1.00 |      | 6.00  | 6.00  |      |      |      |      |      |      |
| 1.00 |      | 1.00  | 1.00  |      |      |      |      |      |      |
| 1.00 |      | 6.00  | 6.00  |      |      |      |      |      |      |
| 1.00 |      | 6.00  | 6.00  |      |      |      |      |      |      |
| 1.00 |      | 6.00  | 6.00  |      |      |      |      |      |      |
| 1.00 |      | 8.00  | 8.00  |      |      |      |      |      |      |
| 1.00 |      | 6.00  | 6.00  |      |      |      |      |      |      |
| 1.00 | .00  | 5.00  | 5.00  | 1.00 | 1.00 | .00  | .00  | .00  | 1.00 |
| 1.00 | 1.00 | 4.00  | 4.00  | 1.00 | 1.00 | .00  | .00  | .00  | .00  |
| 1.00 | .00  | 4.00  | 4.00  | 1.00 | 1.00 | .00  | 1.00 | .00  | .00  |
| 1.00 |      | 5.00  | 5.00  |      |      |      |      |      |      |
| 1.00 | .00  | 4.00  | 4.00  | 1.00 | 1.00 | .00  | .00  | 1.00 | .00  |
| 1.00 | .00  | 4.00  | 4.00  | 1.00 | 1.00 | .00  | .00  | 1.00 | .00  |
| 1.00 |      | 4.00  | 4.00  |      |      |      |      |      |      |
| 1.00 |      | 8.00  | 8.00  |      |      |      |      |      |      |
| 1.00 |      | 6.00  | 6.00  |      |      |      |      |      |      |
| 1.00 |      | 6.00  | 6.00  |      |      |      |      |      |      |
| 1.00 | .00  | 4.00  | 4.00  | 1.00 | 1.00 | 1.00 | .00  | .00  | .00  |
| 1.00 | .00  | 4.00  | 4.00  | 1.00 | 1.00 | .00  | .00  | 1.00 | .00  |
| 1.00 | .00  | 1.00  | 1.00  | 1.00 | 1.00 | 1.00 | .00  | .00  | .00  |
| 1.00 |      | 15.00 | 15.00 |      |      |      |      |      |      |
| 1.00 |      | 1.00  | 1.00  |      |      |      |      |      |      |
| 1.00 |      | 9.00  | 9.00  |      |      |      |      |      |      |
| 1.00 | .00  | 4.00  | 4.00  | 1.00 | 1.00 | .00  | .00  | 1.00 | .00  |
| 1.00 |      | 5.00  | 5.00  |      |      |      |      |      |      |
| 1.00 | .00  | 4.00  | 4.00  | 1.00 | 1.00 | .00  | .00  | 1.00 | .00  |
| 1.00 |      | 4.00  | 4.00  |      |      |      |      |      |      |
| 1.00 | .00  | 4.00  | 4.00  | 1.00 | 1.00 | .00  | .00  | 1.00 | .00  |
| 1.00 | .00  | 2.00  | 2.00  | 1.00 | 1.00 | .00  | .00  | 1.00 | .00  |
| 1.00 | .00  | 5.00  | 5.00  | 1.00 | 1.00 | .00  | .00  | 1.00 | .00  |
| 1.00 |      | 6.00  | 6.00  |      |      |      |      |      |      |
| 1.00 |      | 2.00  | 2.00  |      |      |      |      |      |      |
| 1.00 | 1.00 | 4.00  | 4.00  | 1.00 | 1.00 | .00  | 1.00 | .00  | .00  |
| 1.00 |      | 8.00  | 8.00  |      |      |      |      |      |      |
| 1.00 | .00  | 4.00  | 4.00  | 1.00 | 1.00 | .00  | 1.00 | .00  | .00  |
| 1.00 |      | 6.00  | 6.00  |      |      |      |      |      |      |
| 1.00 | .00  | 3.00  | 3.00  | 1.00 | 1.00 | .00  | .00  | .00  | .00  |
| 1.00 | .00  | 5.00  | 5.00  | 1.00 | 1.00 | .00  | .00  | .00  | .00  |
| 1.00 | .00  | 4.00  | 4.00  | 1.00 | 1.00 | .00  | .00  | 1.00 | .00  |
| 1.00 | .00  | 1.00  | 1.00  | 1.00 | 1.00 | .00  | .00  | .00  | 1.00 |
| 1.00 | .00  | 4.00  | 4.00  | 1.00 | 1.00 | 1.00 | .00  | .00  | .00  |
| 1.00 | .00  | 4.00  | 4.00  | 1.00 | 1.00 | .00  | .00  | 1.00 | .00  |
| 1.00 | .00  | 2.00  | 2.00  | 1.00 | 1.00 | .00  | .00  | 1.00 | .00  |
| 1.00 | .00  | 4.00  | 4.00  | 1.00 | 1.00 | .00  | 1.00 | .00  | .00  |
| 1.00 | .00  | 2.00  | 2.00  | 1.00 | 1.00 | .00  | .00  | .00  | 1.00 |
| 1.00 |      | 9.00  | 9.00  |      |      |      |      |      |      |
| 1.00 |      | 8.00  | 8.00  |      |      |      |      |      |      |
| 1.00 | .00  | 4.00  | 4.00  | 1.00 | 1.00 | .00  | .00  | 1.00 | .00  |
| 1.00 | .00  | 5.00  | 5.00  | 1.00 | 1.00 | .00  | .00  | 1.00 | .00  |
| 1.00 |      | 12.00 | 12.00 |      |      |      |      |      |      |
| 1.00 | .00  | 4.00  | 4.00  | 1.00 | 1.00 | .00  | .00  | 1.00 | .00  |
| 1.00 |      | 6.00  | 6.00  |      |      |      |      |      |      |



























1.00  
2.00  
3.00  
3.00  
1.00  
2.00  
2.00  
3.00  
3.00  
1.00  
3.00  
4.00  
1.00  
1.00  
4.00  
3.00  
4.00  
2.00  
3.00  
3.00  
3.00  
1.00  
1.00  
2.00  
2.00  
1.00  
1.00  
2.00  
3.00  
4.00  
1.00  
2.00  
1.00  
3.00  
3.00  
3.00  
1.00  
4.00  
3.00  
3.00  
3.00  
3.00  
3.00  
2.00  
2.00  
6.00  
3.00  
3.00  
1.00  
1.00  
3.00  
3.00  
2.00  
1.00  
1.00

2.00  
2.00  
1.00  
3.00  
1.00  
2.00  
1.00  
1.00  
1.00  
1.00  
1.00  
3.00  
3.00  
3.00  
2.00  
1.00  
3.00  
1.00  
3.00  
1.00  
1.00  
1.00  
1.00  
1.00  
1.00  
1.00  
2.00  
4.00  
3.00  
6.00  
1.00  
3.00  
1.00  
1.00  
2.00  
1.00  
1.00  
1.00  
1.00  
1.00  
1.00  
2.00  
4.00  
1.00  
1.00  
1.00  
1.00  
3.00  
4.00  
2.00  
1.00  
3.00  
2.00  
2.00  
1.00  
1.00  
3.00  
2.00

2.00  
2.00  
5.00  
2.00  
2.00  
3.00  
3.00  
3.00  
1.00  
2.00  
4.00  
2.00  
3.00  
1.00  
3.00  
3.00  
4.00  
1.00  
4.00  
1.00  
3.00  
3.00  
1.00  
5.00  
3.00  
3.00  
1.00  
2.00  
3.00  
5.00  
1.00  
3.00  
3.00  
3.00  
1.00  
4.00  
3.00  
3.00  
1.00  
1.00  
2.00  
3.00  
3.00  
1.00  
3.00  
4.00  
3.00  
1.00  
1.00  
3.00  
3.00  
3.00  
1.00  
1.00  
4.00  
3.00



3.00  
4.00  
2.00  
1.00  
3.00  
3.00  
1.00  
3.00  
3.00  
6.00  
3.00  
1.00  
1.00  
3.00  
3.00  
3.00  
1.00  
1.00  
3.00  
4.00  
1.00  
5.00  
2.00  
4.00  
3.00  
3.00  
3.00  
5.00  
5.00  
3.00  
1.00  
1.00  
3.00  
2.00  
4.00  
1.00  
2.00  
5.00  
3.00  
1.00  
4.00  
3.00  
4.00  
1.00  
3.00  
2.00  
1.00  
2.00  
2.00  
4.00  
3.00  
3.00  
2.00  
1.00  
3.00  
3.00

3.00  
3.00  
2.00  
1.00  
1.00  
5.00  
3.00  
5.00  
3.00  
3.00  
4.00  
6.00  
2.00  
5.00  
2.00  
1.00  
3.00  
2.00  
2.00  
1.00  
3.00  
1.00  
2.00  
1.00  
3.00  
3.00  
2.00  
3.00  
4.00
